# Supplementary material
Source: publisher figshare collection journal article supplement (https://acs.figshare.com/ndownloader/files/4540585)
Supplement: Supplementary file 1 [file 4540585]

ATOM      1  O           0      32.250  -0.075  36.188  3.05  1.00          O -.48200
ATOM      2  C           0      31.843   0.065  35.049  3.52  1.00          C 0.52500
ATOM      3  C           0      32.796   0.865  34.177  3.95  1.00          C -.04300
ATOM      4  C           0      34.100   1.422  34.779  3.95  1.00          C 0.00000
ATOM      5  C           0      34.988   2.385  33.969  3.95  1.00          C 0.00000
ATOM      6  C           0      35.871   3.246  34.891  3.95  1.00          C 0.00000
ATOM      7  C           0      36.950   2.437  35.633  3.95  1.00          C 0.00000
ATOM      8  C           0      37.970   3.163  36.529  3.75  1.00          C 0.00000
ATOM      9  O           0       9.172   7.766   7.114  3.05  1.00          O -.48200
ATOM     10  C           0       8.980   8.668   6.320  3.52  1.00          C 0.52500
ATOM     11  C           0       9.219   8.675   4.819  3.95  1.00          C -.04300
ATOM     12  C           0       9.909   7.364   4.397  3.95  1.00          C 0.00000
ATOM     13  C           0      10.009   7.426   2.861  3.95  1.00          C 0.00000
ATOM     14  C           0      10.172   6.092   2.109  3.95  1.00          C 0.00000
ATOM     15  C           0      10.127   6.307   0.585  3.95  1.00          C 0.00000
ATOM     16  C           0       8.797   6.878   0.056  3.75  1.00          C 0.00000
ATOM     17  O           0       1.812  15.924   3.462  3.05  1.00          O -.48200
ATOM     18  C           0       1.310  14.862   3.780  3.52  1.00          C 0.52500
ATOM     19  C           0       2.069  13.546   3.806  3.95  1.00          C -.04300
ATOM     20  C           0       3.329  13.664   2.928  3.95  1.00          C 0.00000
ATOM     21  C           0       4.157  12.372   3.052  3.95  1.00          C 0.00000
ATOM     22  C           0       5.528  12.261   2.360  3.95  1.00          C 0.00000
ATOM     23  C           0       6.070  10.840   2.602  3.95  1.00          C 0.00000
ATOM     24  C           0       7.543  10.689   2.177  3.75  1.00          C 0.00000
ATOM     25  O           0      27.846  12.187   2.076  3.05  1.00          O -.48200
ATOM     26  C           0      27.545  11.589   1.059  3.52  1.00          C 0.52500
ATOM     27  C           0      28.158  10.232   0.755  3.95  1.00          C -.04300
ATOM     28  C           0      29.330  10.017   1.730  3.95  1.00          C 0.00000
ATOM     29  C           0      30.634  10.635   1.192  3.95  1.00          C 0.00000
ATOM     30  C           0      31.747  10.732   2.252  3.95  1.00          C 0.00000
ATOM     31  C           0      33.086  11.300   1.745  3.95  1.00          C 0.00000
ATOM     32  C           0      34.152  11.255   2.856  3.75  1.00          C 0.00000
ATOM     33  O           0      -0.776  25.311   1.637  3.05  1.00          O -.48200
ATOM     34  C           0      -0.171  25.699   2.619  3.52  1.00          C 0.52500
ATOM     35  C           0       0.078  24.737   3.769  3.95  1.00          C -.04300
ATOM     36  C           0      -0.218  23.259   3.456  3.95  1.00          C 0.00000
ATOM     37  C           0      -0.150  22.342   4.691  3.95  1.00          C 0.00000
ATOM     38  C           0       1.199  22.302   5.431  3.95  1.00          C 0.00000
ATOM     39  C           0       1.266  21.513   6.752  3.95  1.00          C 0.00000
ATOM     40  C           0       2.142  22.163   7.838  3.75  1.00          C 0.00000
ATOM     41  O           0       8.604  35.802  12.987  3.05  1.00          O -.48200
ATOM     42  C           0       8.000  34.776  12.732  3.52  1.00          C 0.52500
ATOM     43  C           0       6.696  34.739  11.953  3.95  1.00          C -.04300
ATOM     44  C           0       6.684  34.064  10.568  3.95  1.00          C 0.00000
ATOM     45  C           0       5.384  34.035   9.743  3.95  1.00          C 0.00000
ATOM     46  C           0       5.602  33.575   8.289  3.95  1.00          C 0.00000
ATOM     47  C           0       4.332  33.460   7.426  3.95  1.00          C 0.00000
ATOM     48  C           0       4.475  32.971   5.973  3.75  1.00          C 0.00000
ATOM     49  O           0       5.473   1.932  30.203  3.05  1.00          O -.48200
ATOM     50  C           0       5.101   2.616  31.139  3.52  1.00          C 0.52500
ATOM     51  C           0       4.005   2.137  32.077  3.95  1.00          C -.04300
ATOM     52  C           0       4.174   0.622  32.295  3.95  1.00          C 0.00000
ATOM     53  C           0       3.143  -0.003  33.254  3.95  1.00          C 0.00000
ATOM     54  C           0       1.709  -0.180  32.721  3.95  1.00          C 0.00000
ATOM     55  C           0       0.913  -1.122  33.643  3.95  1.00          C 0.00000
ATOM     56  C           0       1.582  -2.489  33.876  3.75  1.00          C 0.00000
ATOM     57  O           0       8.449   1.408  36.547  3.05  1.00          O -.48200
ATOM     58  C           0       8.463   1.577  35.342  3.52  1.00          C 0.52500
ATOM     59  C           0       7.512   2.546  34.658  3.95  1.00          C -.04300
ATOM     60  C           0       6.952   3.595  35.637  3.95  1.00          C 0.00000
ATOM     61  C           0       5.894   4.583  35.111  3.95  1.00          C 0.00000
ATOM     62  C           0       5.498   5.653  36.146  3.95  1.00          C 0.00000
ATOM     63  C           0       4.485   6.722  35.695  3.95  1.00          C 0.00000
ATOM     64  C           0       4.361   7.820  36.767  3.75  1.00          C 0.00000
ATOM     65  O           0       4.117  12.421  10.550  3.05  1.00          O -.48200
ATOM     66  C           0       3.299  12.036   9.736  3.52  1.00          C 0.52500
ATOM     67  C           0       3.631  12.421   8.303  3.95  1.00          C -.04300
ATOM     68  C           0       4.384  13.759   8.181  3.95  1.00          C 0.00000
ATOM     69  C           0       4.748  14.000   6.704  3.95  1.00          C 0.00000
ATOM     70  C           0       5.602  15.265   6.497  3.95  1.00          C 0.00000
ATOM     71  C           0       5.862  15.669   5.034  3.95  1.00          C 0.00000
ATOM     72  C           0       6.345  17.131   5.015  3.75  1.00          C 0.00000
ATOM     73  O           0      34.390  16.039   1.542  3.05  1.00          O -.48200
ATOM     74  C           0      33.871  16.953   2.155  3.52  1.00          C 0.52500
ATOM     75  C           0      34.812  17.919   2.855  3.95  1.00          C -.04300
ATOM     76  C           0      34.194  19.330   2.848  3.95  1.00          C 0.00000
ATOM     77  C           0      32.845  19.462   3.580  3.95  1.00          C 0.00000
ATOM     78  C           0      32.489  20.899   4.005  3.95  1.00          C 0.00000
ATOM     79  C           0      31.128  21.007   4.718  3.95  1.00          C 0.00000
ATOM     80  C           0      31.046  20.048   5.920  3.75  1.00          C 0.00000
ATOM     81  O           0       9.111  22.435   0.550  3.05  1.00          O -.48200
ATOM     82  C           0      10.169  22.886   0.949  3.52  1.00          C 0.52500
ATOM     83  C           0      10.358  23.324   2.392  3.95  1.00          C -.04300
ATOM     84  C           0       9.014  23.252   3.141  3.95  1.00          C 0.00000
ATOM     85  C           0       9.190  23.327   4.669  3.95  1.00          C 0.00000
ATOM     86  C           0       7.887  23.037   5.438  3.95  1.00          C 0.00000
ATOM     87  C           0       6.684  23.844   4.915  3.95  1.00          C 0.00000
ATOM     88  C           0       5.415  23.751   5.783  3.75  1.00          C 0.00000
ATOM     89  O           0       7.190  25.828   1.822  3.05  1.00          O -.48200
ATOM     90  C           0       7.790  26.301   0.875  3.52  1.00          C 0.52500
ATOM     91  C           0       8.055  27.796   0.816  3.95  1.00          C -.04300
ATOM     92  C           0       7.434  28.490   2.043  3.95  1.00          C 0.00000
ATOM     93  C           0       7.824  29.980   2.038  3.95  1.00          C 0.00000
ATOM     94  C           0       7.345  30.723   3.299  3.95  1.00          C 0.00000
ATOM     95  C           0       7.929  32.146   3.357  3.95  1.00          C 0.00000
ATOM     96  C           0       9.414  32.243   3.754  3.75  1.00          C 0.00000
ATOM     97  O           0      15.355   3.440  -0.405  3.05  1.00          O -.48200
ATOM     98  C           0      14.432   3.574   0.377  3.52  1.00          C 0.52500
ATOM     99  C           0      14.525   3.725   1.887  3.95  1.00          C -.04300
ATOM    100  C           0      16.016   3.849   2.249  3.95  1.00          C 0.00000
ATOM    101  C           0      16.285   4.109   3.743  3.95  1.00          C 0.00000
ATOM    102  C           0      16.015   5.496   4.355  3.95  1.00          C 0.00000
ATOM    103  C           0      16.372   5.454   5.852  3.95  1.00          C 0.00000
ATOM    104  C           0      15.741   6.646   6.595  3.75  1.00          C 0.00000
ATOM    105  O           0      14.352   7.268  36.879  3.05  1.00          O -.48200
ATOM    106  C           0      13.805   8.354  36.836  3.52  1.00          C 0.52500
ATOM    107  C           0      13.057   8.750  35.574  3.95  1.00          C -.04300
ATOM    108  C           0      12.767   7.556  34.646  3.95  1.00          C 0.00000
ATOM    109  C           0      12.026   7.988  33.366  3.95  1.00          C 0.00000
ATOM    110  C           0      12.833   8.958  32.483  3.95  1.00          C 0.00000
ATOM    111  C           0      12.389   9.217  31.031  3.95  1.00          C 0.00000
ATOM    112  C           0      11.047   9.966  31.128  3.75  1.00          C 0.00000
ATOM    113  O           0      16.693  16.036   1.477  3.05  1.00          O -.48200
ATOM    114  C           0      17.777  15.533   1.707  3.52  1.00          C 0.52500
ATOM    115  C           0      17.895  14.427   2.743  3.95  1.00          C -.04300
ATOM    116  C           0      16.927  14.735   3.900  3.95  1.00          C 0.00000
ATOM    117  C           0      16.871  13.698   5.037  3.95  1.00          C 0.00000
ATOM    118  C           0      16.364  12.316   4.584  3.95  1.00          C 0.00000
ATOM    119  C           0      16.478  11.112   5.537  3.95  1.00          C 0.00000
ATOM    120  C           0      16.023   9.813   4.847  3.75  1.00          C 0.00000
ATOM    121  O           0       2.375  19.166   4.433  3.05  1.00          O -.48200
ATOM    122  C           0       3.213  18.471   3.890  3.52  1.00          C 0.52500
ATOM    123  C           0       3.908  18.979   2.638  3.95  1.00          C -.04300
ATOM    124  C           0       3.426  20.215   1.856  3.95  1.00          C 0.00000
ATOM    125  C           0       2.019  20.082   1.244  3.95  1.00          C 0.00000
ATOM    126  C           0       2.018  21.095   0.084  3.95  1.00          C 0.00000
ATOM    127  C           0       0.787  21.190  -0.836  3.95  1.00          C 0.00000
ATOM    128  C           0       0.871  22.003  -2.141  3.75  1.00          C 0.00000
ATOM    129  O           0      17.961  29.845   3.266  3.05  1.00          O -.48200
ATOM    130  C           0      16.988  29.349   3.803  3.52  1.00          C 0.52500
ATOM    131  C           0      15.519  29.581   3.489  3.95  1.00          C -.04300
ATOM    132  C           0      15.299  30.008   2.026  3.95  1.00          C 0.00000
ATOM    133  C           0      13.804  30.252   1.748  3.95  1.00          C 0.00000
ATOM    134  C           0      13.368  30.679   0.335  3.95  1.00          C 0.00000
ATOM    135  C           0      11.921  31.194   0.446  3.95  1.00          C 0.00000
ATOM    136  C           0      11.239  31.860  -0.764  3.75  1.00          C 0.00000
ATOM    137  O           0      19.347  33.912   9.144  3.05  1.00          O -.48200
ATOM    138  C           0      18.542  33.471   9.944  3.52  1.00          C 0.52500
ATOM    139  C           0      17.191  34.167   9.974  3.95  1.00          C -.04300
ATOM    140  C           0      16.926  35.529   9.306  3.95  1.00          C 0.00000
ATOM    141  C           0      15.464  35.940   9.049  3.95  1.00          C 0.00000
ATOM    142  C           0      15.575  37.323   8.382  3.95  1.00          C 0.00000
ATOM    143  C           0      14.208  38.022   8.256  3.95  1.00          C 0.00000
ATOM    144  C           0      14.493  39.380   7.589  3.75  1.00          C 0.00000
ATOM    145  O           0      18.092  31.533   6.014  3.05  1.00          O -.48200
ATOM    146  C           0      18.741  32.189   5.221  3.52  1.00          C 0.52500
ATOM    147  C           0      19.279  33.533   5.682  3.95  1.00          C -.04300
ATOM    148  C           0      20.697  33.321   6.246  3.95  1.00          C 0.00000
ATOM    149  C           0      21.348  34.661   6.637  3.95  1.00          C 0.00000
ATOM    150  C           0      22.806  34.529   7.117  3.95  1.00          C 0.00000
ATOM    151  C           0      23.323  35.969   7.286  3.95  1.00          C 0.00000
ATOM    152  C           0      24.818  36.112   7.627  3.75  1.00          C 0.00000
ATOM    153  O           0      24.227  10.751   9.201  3.05  1.00          O -.48200
ATOM    154  C           0      24.107   9.540   9.185  3.52  1.00          C 0.52500
ATOM    155  C           0      24.009   8.644   7.961  3.95  1.00          C -.04300
ATOM    156  C           0      23.920   9.349   6.594  3.95  1.00          C 0.00000
ATOM    157  C           0      23.820   8.502   5.312  3.95  1.00          C 0.00000
ATOM    158  C           0      23.729   9.292   3.993  3.95  1.00          C 0.00000
ATOM    159  C           0      23.731   8.450   2.704  3.95  1.00          C 0.00000
ATOM    160  C           0      24.923   7.476   2.758  3.75  1.00          C 0.00000
ATOM    161  O           0      21.370  12.069   1.190  3.05  1.00          O -.48200
ATOM    162  C           0      20.892  12.044   2.308  3.52  1.00          C 0.52500
ATOM    163  C           0      20.008  10.871   2.700  3.95  1.00          C -.04300
ATOM    164  C           0      19.383  10.221   1.452  3.95  1.00          C 0.00000
ATOM    165  C           0      18.700   8.852   1.628  3.95  1.00          C 0.00000
ATOM    166  C           0      18.317   8.337   0.229  3.95  1.00          C 0.00000
ATOM    167  C           0      17.852   6.870   0.174  3.95  1.00          C 0.00000
ATOM    168  C           0      17.201   6.365  -1.128  3.75  1.00          C 0.00000
ATOM    169  O           0      13.120  19.573  32.930  3.05  1.00          O -.48200
ATOM    170  C           0      11.962  19.436  32.581  3.52  1.00          C 0.52500
ATOM    171  C           0      11.151  18.192  32.904  3.95  1.00          C -.04300
ATOM    172  C           0      10.357  18.365  34.212  3.95  1.00          C 0.00000
ATOM    173  C           0       9.691  17.101  34.788  3.95  1.00          C 0.00000
ATOM    174  C           0       8.811  17.426  36.010  3.95  1.00          C 0.00000
ATOM    175  C           0       9.451  18.527  36.875  3.95  1.00          C 0.00000
ATOM    176  C           0       8.462  19.114  37.900  3.75  1.00          C 0.00000
ATOM    177  O           0      18.266  23.873   3.822  3.05  1.00          O -.48200
ATOM    178  C           0      18.341  25.054   3.537  3.52  1.00          C 0.52500
ATOM    179  C           0      17.431  25.753   2.540  3.95  1.00          C -.04300
ATOM    180  C           0      16.606  24.789   1.667  3.95  1.00          C 0.00000
ATOM    181  C           0      15.513  25.485   0.834  3.95  1.00          C 0.00000
ATOM    182  C           0      14.217  26.000   1.487  3.95  1.00          C 0.00000
ATOM    183  C           0      13.095  26.191   0.449  3.95  1.00          C 0.00000
ATOM    184  C           0      11.864  26.634   1.261  3.75  1.00          C 0.00000
ATOM    185  O           0      20.613  27.070   3.104  3.05  1.00          O -.48200
ATOM    186  C           0      20.073  28.099   2.741  3.52  1.00          C 0.52500
ATOM    187  C           0      20.802  29.291   2.145  3.95  1.00          C -.04300
ATOM    188  C           0      22.327  29.213   1.941  3.95  1.00          C 0.00000
ATOM    189  C           0      22.892  30.449   1.217  3.95  1.00          C 0.00000
ATOM    190  C           0      24.361  30.200   0.829  3.95  1.00          C 0.00000
ATOM    191  C           0      24.923  31.499   0.220  3.95  1.00          C 0.00000
ATOM    192  C           0      25.301  32.508   1.320  3.75  1.00          C 0.00000
ATOM    193  O           0      26.136  16.634  29.743  3.05  1.00          O -.48200
ATOM    194  C           0      25.494  17.668  29.745  3.52  1.00          C 0.52500
ATOM    195  C           0      24.862  17.973  31.094  3.95  1.00          C -.04300
ATOM    196  C           0      25.253  16.804  32.017  3.95  1.00          C 0.00000
ATOM    197  C           0      24.935  17.059  33.501  3.95  1.00          C 0.00000
ATOM    198  C           0      24.756  15.762  34.311  3.95  1.00          C 0.00000
ATOM    199  C           0      24.586  15.934  35.832  3.95  1.00          C 0.00000
ATOM    200  C           0      24.380  14.787  36.838  3.75  1.00          C 0.00000
ATOM    201  O           0      18.234   4.331  31.999  3.05  1.00          O -.48200
ATOM    202  C           0      18.626   3.342  32.589  3.52  1.00          C 0.52500
ATOM    203  C           0      20.108   3.031  32.725  3.95  1.00          C -.04300
ATOM    204  C           0      20.697   3.835  33.899  3.95  1.00          C 0.00000
ATOM    205  C           0      22.155   3.411  34.155  3.95  1.00          C 0.00000
ATOM    206  C           0      22.953   4.205  35.205  3.95  1.00          C 0.00000
ATOM    207  C           0      24.423   3.751  35.120  3.95  1.00          C 0.00000
ATOM    208  C           0      25.225   4.474  36.219  3.75  1.00          C 0.00000
ATOM    209  O           0      23.071  12.606   4.631  3.05  1.00          O -.48200
ATOM    210  C           0      23.751  13.207   5.441  3.52  1.00          C 0.52500
ATOM    211  C           0      23.817  14.719   5.295  3.95  1.00          C -.04300
ATOM    212  C           0      22.899  15.319   4.215  3.95  1.00          C 0.00000
ATOM    213  C           0      22.772  16.849   4.086  3.95  1.00          C 0.00000
ATOM    214  C           0      21.684  17.179   3.047  3.95  1.00          C 0.00000
ATOM    215  C           0      21.411  18.694   3.020  3.95  1.00          C 0.00000
ATOM    216  C           0      20.680  19.223   4.268  3.75  1.00          C 0.00000
ATOM    217  O           0      20.831  17.064  35.636  3.05  1.00          O -.48200
ATOM    218  C           0      20.660  16.022  35.029  3.52  1.00          C 0.52500
ATOM    219  C           0      20.471  16.112  33.524  3.95  1.00          C -.04300
ATOM    220  C           0      20.734  17.499  32.907  3.95  1.00          C 0.00000
ATOM    221  C           0      20.619  17.630  31.377  3.95  1.00          C 0.00000
ATOM    222  C           0      21.331  18.846  30.756  3.95  1.00          C 0.00000
ATOM    223  C           0      20.882  19.201  29.326  3.95  1.00          C 0.00000
ATOM    224  C           0      19.370  19.299  29.052  3.75  1.00          C 0.00000
ATOM    225  O           0      20.228  26.574  35.655  3.05  1.00          O -.48200
ATOM    226  C           0      20.630  25.443  35.452  3.52  1.00          C 0.52500
ATOM    227  C           0      21.937  24.985  34.826  3.95  1.00          C -.04300
ATOM    228  C           0      22.366  23.582  35.293  3.95  1.00          C 0.00000
ATOM    229  C           0      23.554  22.939  34.554  3.95  1.00          C 0.00000
ATOM    230  C           0      23.913  21.487  34.923  3.95  1.00          C 0.00000
ATOM    231  C           0      23.954  21.357  36.457  3.95  1.00          C 0.00000
ATOM    232  C           0      24.721  20.098  36.901  3.75  1.00          C 0.00000
ATOM    233  O           0      34.252  28.168   2.930  3.05  1.00          O -.48200
ATOM    234  C           0      33.109  28.586   2.971  3.52  1.00          C 0.52500
ATOM    235  C           0      32.447  29.132   4.225  3.95  1.00          C -.04300
ATOM    236  C           0      33.275  29.112   5.523  3.95  1.00          C 0.00000
ATOM    237  C           0      32.646  29.662   6.817  3.95  1.00          C 0.00000
ATOM    238  C           0      31.327  28.911   7.080  3.95  1.00          C 0.00000
ATOM    239  C           0      30.838  29.198   8.511  3.95  1.00          C 0.00000
ATOM    240  C           0      29.546  28.454   8.897  3.75  1.00          C 0.00000
ATOM    241  O           0      34.273   0.275   3.262  3.05  1.00          O -.48200
ATOM    242  C           0      33.095   0.581   3.218  3.52  1.00          C 0.52500
ATOM    243  C           0      32.684   1.961   2.732  3.95  1.00          C -.04300
ATOM    244  C           0      33.831   2.987   2.783  3.95  1.00          C 0.00000
ATOM    245  C           0      33.629   4.376   2.149  3.95  1.00          C 0.00000
ATOM    246  C           0      34.917   5.220   2.117  3.95  1.00          C 0.00000
ATOM    247  C           0      34.704   6.585   1.438  3.95  1.00          C 0.00000
ATOM    248  C           0      33.620   7.463   2.090  3.75  1.00          C 0.00000
ATOM    249  O           0      27.232  36.311  31.781  3.05  1.00          O -.48200
ATOM    250  C           0      26.432  37.227  31.827  3.52  1.00          C 0.52500
ATOM    251  C           0      25.662  37.372  33.129  3.95  1.00          C -.04300
ATOM    252  C           0      25.026  36.081  33.676  3.95  1.00          C 0.00000
ATOM    253  C           0      23.807  35.526  32.915  3.95  1.00          C 0.00000
ATOM    254  C           0      22.992  34.508  33.736  3.95  1.00          C 0.00000
ATOM    255  C           0      22.144  35.204  34.817  3.95  1.00          C 0.00000
ATOM    256  C           0      21.093  36.199  34.292  3.75  1.00          C 0.00000
ATOM    257  O           0      31.828   6.721  31.908  3.05  1.00          O -.48200
ATOM    258  C           0      32.209   7.865  32.073  3.52  1.00          C 0.52500
ATOM    259  C           0      32.342   8.381  33.496  3.95  1.00          C -.04300
ATOM    260  C           0      31.923   7.405  34.612  3.95  1.00          C 0.00000
ATOM    261  C           0      30.404   7.156  34.649  3.95  1.00          C 0.00000
ATOM    262  C           0      30.164   5.858  35.443  3.95  1.00          C 0.00000
ATOM    263  C           0      30.749   4.600  34.773  3.95  1.00          C 0.00000
ATOM    264  C           0      30.603   3.310  35.602  3.75  1.00          C 0.00000
ATOM    265  O           0      31.603  11.406   6.841  3.05  1.00          O -.48200
ATOM    266  C           0      31.448  10.462   7.593  3.52  1.00          C 0.52500
ATOM    267  C           0      32.444   9.326   7.427  3.95  1.00          C -.04300
ATOM    268  C           0      33.640   9.770   6.564  3.95  1.00          C 0.00000
ATOM    269  C           0      34.736   8.710   6.348  3.95  1.00          C 0.00000
ATOM    270  C           0      35.943   9.404   5.691  3.95  1.00          C 0.00000
ATOM    271  C           0      37.001   8.477   5.064  3.95  1.00          C 0.00000
ATOM    272  C           0      38.404   9.081   4.868  3.75  1.00          C 0.00000
ATOM    273  O           0      25.069  24.470   6.303  3.05  1.00          O -.48200
ATOM    274  C           0      24.020  24.018   5.882  3.52  1.00          C 0.52500
ATOM    275  C           0      23.693  24.222   4.412  3.95  1.00          C -.04300
ATOM    276  C           0      24.747  24.969   3.574  3.95  1.00          C 0.00000
ATOM    277  C           0      24.265  25.849   2.406  3.95  1.00          C 0.00000
ATOM    278  C           0      25.407  26.729   1.866  3.95  1.00          C 0.00000
ATOM    279  C           0      26.078  27.469   3.038  3.95  1.00          C 0.00000
ATOM    280  C           0      27.149  28.500   2.637  3.75  1.00          C 0.00000
ATOM    281  O           0      30.255  25.328  33.472  3.05  1.00          O -.48200
ATOM    282  C           0      30.501  25.500  34.652  3.52  1.00          C 0.52500
ATOM    283  C           0      29.658  26.501  35.424  3.95  1.00          C -.04300
ATOM    284  C           0      28.564  27.053  34.490  3.95  1.00          C 0.00000
ATOM    285  C           0      27.908  28.371  34.942  3.95  1.00          C 0.00000
ATOM    286  C           0      28.963  29.388  35.416  3.95  1.00          C 0.00000
ATOM    287  C           0      28.353  30.729  35.863  3.95  1.00          C 0.00000
ATOM    288  C           0      29.279  31.851  36.370  3.75  1.00          C 0.00000
ATOM    289  O           0       3.131   1.916  11.206  3.05  1.00          O -.48200
ATOM    290  C           0       3.020   1.539  10.054  3.52  1.00          C 0.52500
ATOM    291  C           0       3.541   2.391   8.908  3.95  1.00          C -.04300
ATOM    292  C           0       2.625   3.564   8.515  3.95  1.00          C 0.00000
ATOM    293  C           0       1.340   3.194   7.750  3.95  1.00          C 0.00000
ATOM    294  C           0       0.289   4.256   7.378  3.95  1.00          C 0.00000
ATOM    295  C           0       0.760   5.325   6.374  3.95  1.00          C 0.00000
ATOM    296  C           0       1.129   4.779   4.983  3.75  1.00          C 0.00000
ATOM    297  O           0      35.619   3.026  12.716  3.05  1.00          O -.48200
ATOM    298  C           0      36.019   1.997  12.204  3.52  1.00          C 0.52500
ATOM    299  C           0      35.348   1.367  10.994  3.95  1.00          C -.04300
ATOM    300  C           0      34.474   2.343  10.185  3.95  1.00          C 0.00000
ATOM    301  C           0      33.587   1.697   9.104  3.95  1.00          C 0.00000
ATOM    302  C           0      32.641   2.620   8.313  3.95  1.00          C 0.00000
ATOM    303  C           0      32.215   2.287   6.871  3.95  1.00          C 0.00000
ATOM    304  C           0      31.174   3.324   6.409  3.75  1.00          C 0.00000
ATOM    305  O           0      -0.915  11.557   9.772  3.05  1.00          O -.48200
ATOM    306  C           0      -1.783  12.201   9.211  3.52  1.00          C 0.52500
ATOM    307  C           0      -1.392  13.304   8.241  3.95  1.00          C -.04300
ATOM    308  C           0      -0.104  14.051   8.634  3.95  1.00          C 0.00000
ATOM    309  C           0       0.051  15.356   7.831  3.95  1.00          C 0.00000
ATOM    310  C           0       1.384  16.026   8.214  3.95  1.00          C 0.00000
ATOM    311  C           0       1.715  17.196   7.268  3.95  1.00          C 0.00000
ATOM    312  C           0       2.943  17.971   7.781  3.75  1.00          C 0.00000
ATOM    313  O           0      32.449  17.108   9.112  3.05  1.00          O -.48200
ATOM    314  C           0      32.972  17.801   8.260  3.52  1.00          C 0.52500
ATOM    315  C           0      34.182  18.632   8.658  3.95  1.00          C -.04300
ATOM    316  C           0      34.283  19.024  10.143  3.95  1.00          C 0.00000
ATOM    317  C           0      35.738  19.475  10.371  3.95  1.00          C 0.00000
ATOM    318  C           0      36.172  19.974  11.762  3.95  1.00          C 0.00000
ATOM    319  C           0      37.691  20.158  11.938  3.95  1.00          C 0.00000
ATOM    320  C           0      38.291  20.517  13.310  3.75  1.00          C 0.00000
ATOM    321  O           0       0.494  30.448   8.114  3.05  1.00          O -.48200
ATOM    322  C           0       0.500  31.591   7.696  3.52  1.00          C 0.52500
ATOM    323  C           0       0.523  31.793   6.189  3.95  1.00          C -.04300
ATOM    324  C           0       1.071  30.539   5.484  3.95  1.00          C 0.00000
ATOM    325  C           0       1.571  30.771   4.046  3.95  1.00          C 0.00000
ATOM    326  C           0       2.110  29.471   3.420  3.95  1.00          C 0.00000
ATOM    327  C           0       3.429  28.965   4.032  3.95  1.00          C 0.00000
ATOM    328  C           0       3.687  27.522   3.558  3.75  1.00          C 0.00000
ATOM    329  O           0      34.450  -0.510  14.021  3.05  1.00          O -.48200
ATOM    330  C           0      33.576  -0.773  14.826  3.52  1.00          C 0.52500
ATOM    331  C           0      32.189  -0.159  14.731  3.95  1.00          C -.04300
ATOM    332  C           0      31.826   0.479  13.377  3.95  1.00          C 0.00000
ATOM    333  C           0      30.608   1.419  13.424  3.95  1.00          C 0.00000
ATOM    334  C           0      29.443   0.854  14.258  3.95  1.00          C 0.00000
ATOM    335  C           0      28.203   1.753  14.094  3.95  1.00          C 0.00000
ATOM    336  C           0      26.857   1.307  14.696  3.75  1.00          C 0.00000
ATOM    337  O           0      10.561  32.896  12.335  3.05  1.00          O -.48200
ATOM    338  C           0      11.249  32.112  11.708  3.52  1.00          C 0.52500
ATOM    339  C           0      12.057  32.468  10.471  3.95  1.00          C -.04300
ATOM    340  C           0      11.842  33.935  10.053  3.95  1.00          C 0.00000
ATOM    341  C           0      10.571  34.225   9.233  3.95  1.00          C 0.00000
ATOM    342  C           0      10.465  35.690   8.769  3.95  1.00          C 0.00000
ATOM    343  C           0       9.159  36.006   8.018  3.95  1.00          C 0.00000
ATOM    344  C           0       9.127  35.081   6.788  3.75  1.00          C 0.00000
ATOM    345  O           0       6.632  10.310   8.094  3.05  1.00          O -.48200
ATOM    346  C           0       6.600   9.941   9.253  3.52  1.00          C 0.52500
ATOM    347  C           0       5.448   9.153   9.854  3.95  1.00          C -.04300
ATOM    348  C           0       4.502   8.358   8.935  3.95  1.00          C 0.00000
ATOM    349  C           0       3.364   7.816   9.819  3.95  1.00          C 0.00000
ATOM    350  C           0       3.632   6.815  10.959  3.95  1.00          C 0.00000
ATOM    351  C           0       2.252   6.167  11.179  3.95  1.00          C 0.00000
ATOM    352  C           0       2.218   5.215  12.388  3.75  1.00          C 0.00000
ATOM    353  O           0       8.643  10.024  12.230  3.05  1.00          O -.48200
ATOM    354  C           0       8.296  10.977  12.904  3.52  1.00          C 0.52500
ATOM    355  C           0       8.845  12.338  12.509  3.95  1.00          C -.04300
ATOM    356  C           0       8.610  12.664  11.023  3.95  1.00          C 0.00000
ATOM    357  C           0       9.220  13.926  10.384  3.95  1.00          C 0.00000
ATOM    358  C           0       8.903  14.093   8.886  3.95  1.00          C 0.00000
ATOM    359  C           0       9.601  13.036   8.010  3.95  1.00          C 0.00000
ATOM    360  C           0       9.369  13.127   6.490  3.75  1.00          C 0.00000
ATOM    361  O           0       7.652  16.716  11.225  3.05  1.00          O -.48200
ATOM    362  C           0       6.983  16.740  10.208  3.52  1.00          C 0.52500
ATOM    363  C           0       5.472  16.577  10.227  3.95  1.00          C -.04300
ATOM    364  C           0       4.833  16.547  11.628  3.95  1.00          C 0.00000
ATOM    365  C           0       3.378  16.043  11.586  3.95  1.00          C 0.00000
ATOM    366  C           0       2.623  16.103  12.927  3.95  1.00          C 0.00000
ATOM    367  C           0       1.197  15.589  12.656  3.95  1.00          C 0.00000
ATOM    368  C           0       1.122  14.119  12.205  3.75  1.00          C 0.00000
ATOM    369  O           0       6.254  26.818  12.265  3.05  1.00          O -.48200
ATOM    370  C           0       5.773  27.825  11.781  3.52  1.00          C 0.52500
ATOM    371  C           0       5.079  27.786  10.429  3.95  1.00          C -.04300
ATOM    372  C           0       4.855  26.342   9.942  3.95  1.00          C 0.00000
ATOM    373  C           0       4.225  26.377   8.537  3.95  1.00          C 0.00000
ATOM    374  C           0       2.715  26.676   8.510  3.95  1.00          C 0.00000
ATOM    375  C           0       1.919  26.026   7.363  3.95  1.00          C 0.00000
ATOM    376  C           0       0.644  26.802   6.987  3.75  1.00          C 0.00000
ATOM    377  O           0      11.967  28.802  11.326  3.05  1.00          O -.48200
ATOM    378  C           0      11.188  27.888  11.520  3.52  1.00          C 0.52500
ATOM    379  C           0       9.676  28.000  11.416  3.95  1.00          C -.04300
ATOM    380  C           0       9.131  29.255  10.708  3.95  1.00          C 0.00000
ATOM    381  C           0       9.413  29.272   9.194  3.95  1.00          C 0.00000
ATOM    382  C           0       8.529  30.273   8.427  3.95  1.00          C 0.00000
ATOM    383  C           0       8.572  30.184   6.891  3.95  1.00          C 0.00000
ATOM    384  C           0       8.036  28.800   6.477  3.75  1.00          C 0.00000
ATOM    385  O           0      10.488   2.872  11.127  3.05  1.00          O -.48200
ATOM    386  C           0      10.516   2.288  12.194  3.52  1.00          C 0.52500
ATOM    387  C           0      11.808   2.157  12.984  3.95  1.00          C -.04300
ATOM    388  C           0      13.039   2.003  12.072  3.95  1.00          C 0.00000
ATOM    389  C           0      14.313   1.604  12.841  3.95  1.00          C 0.00000
ATOM    390  C           0      15.459   2.202  12.004  3.95  1.00          C 0.00000
ATOM    391  C           0      16.863   2.075  12.623  3.95  1.00          C 0.00000
ATOM    392  C           0      18.001   2.282  11.605  3.75  1.00          C 0.00000
ATOM    393  O           0       6.782   2.394   9.849  3.05  1.00          O -.48200
ATOM    394  C           0       7.952   2.596   9.582  3.52  1.00          C 0.52500
ATOM    395  C           0       8.333   3.519   8.435  3.95  1.00          C -.04300
ATOM    396  C           0       7.150   3.830   7.500  3.95  1.00          C 0.00000
ATOM    397  C           0       7.488   3.737   6.000  3.95  1.00          C 0.00000
ATOM    398  C           0       6.204   3.932   5.172  3.95  1.00          C 0.00000
ATOM    399  C           0       5.701   5.387   5.122  3.95  1.00          C 0.00000
ATOM    400  C           0       4.872   5.523   3.832  3.75  1.00          C 0.00000
ATOM    401  O           0      10.861   6.653  10.469  3.05  1.00          O -.48200
ATOM    402  C           0      11.132   6.112   9.413  3.52  1.00          C 0.52500
ATOM    403  C           0      12.094   6.995   8.634  3.95  1.00          C -.04300
ATOM    404  C           0      11.955   8.462   9.080  3.95  1.00          C 0.00000
ATOM    405  C           0      12.841   9.546   8.436  3.95  1.00          C 0.00000
ATOM    406  C           0      12.579  10.980   8.931  3.95  1.00          C 0.00000
ATOM    407  C           0      13.275  12.099   8.134  3.95  1.00          C 0.00000
ATOM    408  C           0      13.064  13.513   8.705  3.75  1.00          C 0.00000
ATOM    409  O           0       7.474  18.872   8.121  3.05  1.00          O -.48200
ATOM    410  C           0       8.177  19.821   7.827  3.52  1.00          C 0.52500
ATOM    411  C           0       9.488  19.706   7.067  3.95  1.00          C -.04300
ATOM    412  C           0      10.106  18.300   7.178  3.95  1.00          C 0.00000
ATOM    413  C           0      11.378  18.124   6.327  3.95  1.00          C 0.00000
ATOM    414  C           0      11.492  16.657   5.872  3.95  1.00          C 0.00000
ATOM    415  C           0      12.825  16.346   5.167  3.95  1.00          C 0.00000
ATOM    416  C           0      12.869  14.896   4.651  3.75  1.00          C 0.00000
ATOM    417  O           0      10.872  26.765   8.340  3.05  1.00          O -.48200
ATOM    418  C           0      10.364  25.665   8.455  3.52  1.00          C 0.52500
ATOM    419  C           0      11.159  24.370   8.473  3.95  1.00          C -.04300
ATOM    420  C           0      12.571  24.504   7.873  3.95  1.00          C 0.00000
ATOM    421  C           0      13.411  23.217   7.979  3.95  1.00          C 0.00000
ATOM    422  C           0      12.910  22.094   7.052  3.95  1.00          C 0.00000
ATOM    423  C           0      13.168  22.488   5.585  3.95  1.00          C 0.00000
ATOM    424  C           0      12.583  21.498   4.561  3.75  1.00          C 0.00000
ATOM    425  O           0      13.571  28.985   8.733  3.05  1.00          O -.48200
ATOM    426  C           0      12.701  29.196   7.908  3.52  1.00          C 0.52500
ATOM    427  C           0      12.681  30.303   6.867  3.95  1.00          C -.04300
ATOM    428  C           0      13.894  31.224   7.096  3.95  1.00          C 0.00000
ATOM    429  C           0      13.896  32.231   5.930  3.95  1.00          C 0.00000
ATOM    430  C           0      15.080  33.187   5.692  3.95  1.00          C 0.00000
ATOM    431  C           0      14.891  33.932   4.357  3.95  1.00          C 0.00000
ATOM    432  C           0      16.123  34.621   3.742  3.75  1.00          C 0.00000
ATOM    433  O           0      20.487   8.156  10.638  3.05  1.00          O -.48200
ATOM    434  C           0      19.506   7.473  10.865  3.52  1.00          C 0.52500
ATOM    435  C           0      19.237   6.064  10.361  3.95  1.00          C -.04300
ATOM    436  C           0      20.223   5.689   9.239  3.95  1.00          C 0.00000
ATOM    437  C           0      19.780   4.385   8.549  3.95  1.00          C 0.00000
ATOM    438  C           0      20.808   3.850   7.535  3.95  1.00          C 0.00000
ATOM    439  C           0      20.331   2.522   6.919  3.95  1.00          C 0.00000
ATOM    440  C           0      19.065   2.546   6.042  3.75  1.00          C 0.00000
ATOM    441  O           0      20.413  -0.958   2.703  3.05  1.00          O -.48200
ATOM    442  C           0      19.624  -0.201   2.167  3.52  1.00          C 0.52500
ATOM    443  C           0      19.946   1.269   1.956  3.95  1.00          C -.04300
ATOM    444  C           0      21.409   1.632   2.271  3.95  1.00          C 0.00000
ATOM    445  C           0      21.750   3.134   2.259  3.95  1.00          C 0.00000
ATOM    446  C           0      20.905   3.943   3.260  3.95  1.00          C 0.00000
ATOM    447  C           0      21.448   5.383   3.189  3.95  1.00          C 0.00000
ATOM    448  C           0      20.873   6.356   4.234  3.75  1.00          C 0.00000
ATOM    449  O           0      18.518   9.560   8.063  3.05  1.00          O -.48200
ATOM    450  C           0      19.552  10.076   7.682  3.52  1.00          C 0.52500
ATOM    451  C           0      20.115  11.309   8.370  3.95  1.00          C -.04300
ATOM    452  C           0      19.261  12.264   9.225  3.95  1.00          C 0.00000
ATOM    453  C           0      18.892  11.672  10.598  3.95  1.00          C 0.00000
ATOM    454  C           0      18.164  12.699  11.485  3.95  1.00          C 0.00000
ATOM    455  C           0      17.491  12.190  12.774  3.95  1.00          C 0.00000
ATOM    456  C           0      18.273  11.270  13.730  3.75  1.00          C 0.00000
ATOM    457  O           0      24.152  18.317  12.068  3.05  1.00          O -.48200
ATOM    458  C           0      23.122  18.551  12.673  3.52  1.00          C 0.52500
ATOM    459  C           0      21.744  18.229  12.119  3.95  1.00          C -.04300
ATOM    460  C           0      21.871  17.633  10.704  3.95  1.00          C 0.00000
ATOM    461  C           0      20.525  17.365  10.006  3.95  1.00          C 0.00000
ATOM    462  C           0      20.920  16.702   8.674  3.95  1.00          C 0.00000
ATOM    463  C           0      19.723  16.218   7.834  3.95  1.00          C 0.00000
ATOM    464  C           0      20.235  15.649   6.497  3.75  1.00          C 0.00000
ATOM    465  O           0      22.484  21.768   6.977  3.05  1.00          O -.48200
ATOM    466  C           0      22.207  21.560   8.143  3.52  1.00          C 0.52500
ATOM    467  C           0      20.866  21.720   8.841  3.95  1.00          C -.04300
ATOM    468  C           0      19.714  20.992   8.124  3.95  1.00          C 0.00000
ATOM    469  C           0      18.311  21.535   8.455  3.95  1.00          C 0.00000
ATOM    470  C           0      18.062  21.684   9.967  3.95  1.00          C 0.00000
ATOM    471  C           0      17.804  20.439  10.837  3.95  1.00          C 0.00000
ATOM    472  C           0      17.073  20.723  12.163  3.75  1.00          C 0.00000
ATOM    473  O           0      16.218  27.267   5.746  3.05  1.00          O -.48200
ATOM    474  C           0      16.096  27.617   6.905  3.52  1.00          C 0.52500
ATOM    475  C           0      17.266  28.195   7.684  3.95  1.00          C -.04300
ATOM    476  C           0      18.580  28.155   6.882  3.95  1.00          C 0.00000
ATOM    477  C           0      19.844  28.688   7.582  3.95  1.00          C 0.00000
ATOM    478  C           0      21.102  28.754   6.695  3.95  1.00          C 0.00000
ATOM    479  C           0      22.290  29.515   7.312  3.95  1.00          C 0.00000
ATOM    480  C           0      23.450  29.490   6.300  3.75  1.00          C 0.00000
ATOM    481  O           0      29.597   0.605   1.870  3.05  1.00          O -.48200
ATOM    482  C           0      28.516   0.507   1.319  3.52  1.00          C 0.52500
ATOM    483  C           0      27.281   1.128   1.950  3.95  1.00          C -.04300
ATOM    484  C           0      27.486   2.060   3.158  3.95  1.00          C 0.00000
ATOM    485  C           0      26.167   2.718   3.603  3.95  1.00          C 0.00000
ATOM    486  C           0      26.298   3.530   4.905  3.95  1.00          C 0.00000
ATOM    487  C           0      25.027   4.310   5.290  3.95  1.00          C 0.00000
ATOM    488  C           0      25.371   5.394   6.328  3.75  1.00          C 0.00000
ATOM    489  O           0      25.255   9.673  15.909  3.05  1.00          O -.48200
ATOM    490  C           0      26.076   9.377  15.060  3.52  1.00          C 0.52500
ATOM    491  C           0      26.676  10.174  13.914  3.95  1.00          C -.04300
ATOM    492  C           0      28.180  10.499  13.843  3.95  1.00          C 0.00000
ATOM    493  C           0      28.517  11.144  12.486  3.95  1.00          C 0.00000
ATOM    494  C           0      27.319  11.802  11.775  3.95  1.00          C 0.00000
ATOM    495  C           0      27.570  11.992  10.268  3.95  1.00          C 0.00000
ATOM    496  C           0      27.263  13.449   9.873  3.75  1.00          C 0.00000
ATOM    497  O           0      21.681  11.319  15.316  3.05  1.00          O -.48200
ATOM    498  C           0      22.838  11.504  15.646  3.52  1.00          C 0.52500
ATOM    499  C           0      23.725  12.473  14.881  3.95  1.00          C -.04300
ATOM    500  C           0      22.979  13.256  13.784  3.95  1.00          C 0.00000
ATOM    501  C           0      22.574  12.505  12.502  3.95  1.00          C 0.00000
ATOM    502  C           0      22.452  13.482  11.318  3.95  1.00          C 0.00000
ATOM    503  C           0      23.749  13.977  10.651  3.95  1.00          C 0.00000
ATOM    504  C           0      23.474  14.388   9.193  3.75  1.00          C 0.00000
ATOM    505  O           0      33.229  14.970   5.721  3.05  1.00          O -.48200
ATOM    506  C           0      32.454  14.071   5.451  3.52  1.00          C 0.52500
ATOM    507  C           0      30.990  14.482   5.471  3.95  1.00          C -.04300
ATOM    508  C           0      30.968  16.002   5.719  3.95  1.00          C 0.00000
ATOM    509  C           0      29.484  16.362   5.917  3.95  1.00          C 0.00000
ATOM    510  C           0      28.714  16.236   4.589  3.95  1.00          C 0.00000
ATOM    511  C           0      27.236  16.670   4.563  3.95  1.00          C 0.00000
ATOM    512  C           0      26.750  16.770   3.106  3.75  1.00          C 0.00000
ATOM    513  O           0      27.339  21.795  11.598  3.05  1.00          O -.48200
ATOM    514  C           0      26.535  20.883  11.536  3.52  1.00          C 0.52500
ATOM    515  C           0      26.359  19.944  10.354  3.95  1.00          C -.04300
ATOM    516  C           0      27.173  20.342   9.109  3.95  1.00          C 0.00000
ATOM    517  C           0      26.812  19.406   7.941  3.95  1.00          C 0.00000
ATOM    518  C           0      27.319  19.790   6.538  3.95  1.00          C 0.00000
ATOM    519  C           0      26.642  21.063   5.996  3.95  1.00          C 0.00000
ATOM    520  C           0      27.239  21.461   4.633  3.75  1.00          C 0.00000
ATOM    521  O           0      25.344  29.070  12.090  3.05  1.00          O -.48200
ATOM    522  C           0      26.401  29.588  11.781  3.52  1.00          C 0.52500
ATOM    523  C           0      26.616  30.398  10.513  3.95  1.00          C -.04300
ATOM    524  C           0      25.423  30.530   9.548  3.95  1.00          C 0.00000
ATOM    525  C           0      25.762  31.386   8.314  3.95  1.00          C 0.00000
ATOM    526  C           0      26.670  30.568   7.377  3.95  1.00          C 0.00000
ATOM    527  C           0      27.220  31.126   6.051  3.95  1.00          C 0.00000
ATOM    528  C           0      26.146  31.791   5.170  3.75  1.00          C 0.00000
ATOM    529  O           0      29.631  32.676  11.104  3.05  1.00          O -.48200
ATOM    530  C           0      30.093  33.793  10.965  3.52  1.00          C 0.52500
ATOM    531  C           0      30.703  34.283   9.662  3.95  1.00          C -.04300
ATOM    532  C           0      30.460  33.395   8.427  3.95  1.00          C 0.00000
ATOM    533  C           0      30.449  34.292   7.176  3.95  1.00          C 0.00000
ATOM    534  C           0      30.381  33.420   5.908  3.95  1.00          C 0.00000
ATOM    535  C           0      30.430  34.055   4.506  3.95  1.00          C 0.00000
ATOM    536  C           0      30.477  33.216   3.215  3.75  1.00          C 0.00000
ATOM    537  O           0      32.140   8.184  16.148  3.05  1.00          O -.48200
ATOM    538  C           0      31.798   9.295  15.787  3.52  1.00          C 0.52500
ATOM    539  C           0      31.884   9.865  14.381  3.95  1.00          C -.04300
ATOM    540  C           0      32.890   9.124  13.480  3.95  1.00          C 0.00000
ATOM    541  C           0      33.056   9.671  12.050  3.95  1.00          C 0.00000
ATOM    542  C           0      34.113   8.908  11.230  3.95  1.00          C 0.00000
ATOM    543  C           0      33.823   7.457  10.803  3.95  1.00          C 0.00000
ATOM    544  C           0      34.937   7.003   9.841  3.75  1.00          C 0.00000
ATOM    545  O           0      27.036  12.341   6.239  3.05  1.00          O -.48200
ATOM    546  C           0      27.608  11.739   5.349  3.52  1.00          C 0.52500
ATOM    547  C           0      28.361  10.442   5.596  3.95  1.00          C -.04300
ATOM    548  C           0      27.500   9.202   5.291  3.95  1.00          C 0.00000
ATOM    549  C           0      28.025   7.910   5.944  3.95  1.00          C 0.00000
ATOM    550  C           0      29.187   7.367   5.091  3.95  1.00          C 0.00000
ATOM    551  C           0      28.819   6.875   3.679  3.95  1.00          C 0.00000
ATOM    552  C           0      30.050   6.339   2.924  3.75  1.00          C 0.00000
ATOM    553  O           0      31.247  12.422   9.871  3.05  1.00          O -.48200
ATOM    554  C           0      30.667  13.485   9.753  3.52  1.00          C 0.52500
ATOM    555  C           0      30.738  14.449  10.926  3.95  1.00          C -.04300
ATOM    556  C           0      31.603  14.001  12.119  3.95  1.00          C 0.00000
ATOM    557  C           0      31.636  14.981  13.306  3.95  1.00          C 0.00000
ATOM    558  C           0      33.048  15.446  13.707  3.95  1.00          C 0.00000
ATOM    559  C           0      33.087  16.764  14.502  3.95  1.00          C 0.00000
ATOM    560  C           0      34.312  17.676  14.306  3.75  1.00          C 0.00000
ATOM    561  O           0      31.443  23.465  10.274  3.05  1.00          O -.48200
ATOM    562  C           0      30.291  23.661  10.614  3.52  1.00          C 0.52500
ATOM    563  C           0      29.255  24.189   9.634  3.95  1.00          C -.04300
ATOM    564  C           0      29.817  24.471   8.229  3.95  1.00          C 0.00000
ATOM    565  C           0      28.926  24.127   7.021  3.95  1.00          C 0.00000
ATOM    566  C           0      29.536  24.295   5.617  3.95  1.00          C 0.00000
ATOM    567  C           0      29.911  25.716   5.158  3.95  1.00          C 0.00000
ATOM    568  C           0      30.614  25.721   3.788  3.75  1.00          C 0.00000
ATOM    569  O           0       0.169  35.110   8.410  3.05  1.00          O -.48200
ATOM    570  C           0      -0.275  35.020   7.281  3.52  1.00          C 0.52500
ATOM    571  C           0       0.359  35.818   6.152  3.95  1.00          C -.04300
ATOM    572  C           0       1.895  35.730   6.085  3.95  1.00          C 0.00000
ATOM    573  C           0       2.488  36.582   4.948  3.95  1.00          C 0.00000
ATOM    574  C           0       3.822  35.999   4.447  3.95  1.00          C 0.00000
ATOM    575  C           0       4.626  36.807   3.411  3.95  1.00          C 0.00000
ATOM    576  C           0       6.077  36.291   3.424  3.75  1.00          C 0.00000
ATOM    577  O           0       8.647   4.854  17.795  3.05  1.00          O -.48200
ATOM    578  C           0       9.238   4.284  16.898  3.52  1.00          C 0.52500
ATOM    579  C           0       8.895   2.825  16.646  3.95  1.00          C -.04300
ATOM    580  C           0       7.595   2.239  17.228  3.95  1.00          C 0.00000
ATOM    581  C           0       7.314   0.811  16.725  3.95  1.00          C 0.00000
ATOM    582  C           0       6.196   0.156  17.557  3.95  1.00          C 0.00000
ATOM    583  C           0       6.114  -1.320  17.127  3.95  1.00          C 0.00000
ATOM    584  C           0       5.735  -1.578  15.657  3.75  1.00          C 0.00000
ATOM    585  O           0       7.327   4.835  13.044  3.05  1.00          O -.48200
ATOM    586  C           0       6.622   4.075  12.407  3.52  1.00          C 0.52500
ATOM    587  C           0       5.593   3.128  13.002  3.95  1.00          C -.04300
ATOM    588  C           0       5.134   3.474  14.431  3.95  1.00          C 0.00000
ATOM    589  C           0       3.977   2.493  14.696  3.95  1.00          C 0.00000
ATOM    590  C           0       3.538   2.617  16.167  3.95  1.00          C 0.00000
ATOM    591  C           0       2.415   1.618  16.503  3.95  1.00          C 0.00000
ATOM    592  C           0       1.970   2.153  17.877  3.75  1.00          C 0.00000
ATOM    593  O           0      -0.619  20.614  17.596  3.05  1.00          O -.48200
ATOM    594  C           0       0.581  20.619  17.394  3.52  1.00          C 0.52500
ATOM    595  C           0       1.489  19.404  17.301  3.95  1.00          C -.04300
ATOM    596  C           0       0.733  18.085  17.052  3.95  1.00          C 0.00000
ATOM    597  C           0       1.521  16.766  16.950  3.95  1.00          C 0.00000
ATOM    598  C           0       2.047  16.299  18.320  3.95  1.00          C 0.00000
ATOM    599  C           0       2.932  15.045  18.187  3.95  1.00          C 0.00000
ATOM    600  C           0       3.619  14.518  19.461  3.75  1.00          C 0.00000
ATOM    601  O           0      30.483  19.537  17.362  3.05  1.00          O -.48200
ATOM    602  C           0      29.975  18.582  16.805  3.52  1.00          C 0.52500
ATOM    603  C           0      29.742  18.611  15.303  3.95  1.00          C -.04300
ATOM    604  C           0      30.178  19.886  14.558  3.95  1.00          C 0.00000
ATOM    605  C           0      29.621  19.799  13.125  3.95  1.00          C 0.00000
ATOM    606  C           0      30.187  18.570  12.390  3.95  1.00          C 0.00000
ATOM    607  C           0      29.665  18.239  10.979  3.95  1.00          C 0.00000
ATOM    608  C           0      28.508  17.238  11.153  3.75  1.00          C 0.00000
ATOM    609  O           0      -2.979  26.290   9.579  3.05  1.00          O -.48200
ATOM    610  C           0      -2.482  25.247   9.196  3.52  1.00          C 0.52500
ATOM    611  C           0      -1.135  24.661   9.589  3.95  1.00          C -.04300
ATOM    612  C           0      -0.514  25.248  10.870  3.95  1.00          C 0.00000
ATOM    613  C           0       0.924  24.722  11.029  3.95  1.00          C 0.00000
ATOM    614  C           0       1.564  24.739  12.429  3.95  1.00          C 0.00000
ATOM    615  C           0       2.997  24.182  12.523  3.95  1.00          C 0.00000
ATOM    616  C           0       3.513  24.148  13.974  3.75  1.00          C 0.00000
ATOM    617  O           0       2.875  27.818  12.605  3.05  1.00          O -.48200
ATOM    618  C           0       1.721  28.185  12.485  3.52  1.00          C 0.52500
ATOM    619  C           0       1.416  29.642  12.177  3.95  1.00          C -.04300
ATOM    620  C           0       2.749  30.325  11.821  3.95  1.00          C 0.00000
ATOM    621  C           0       2.612  31.753  11.261  3.95  1.00          C 0.00000
ATOM    622  C           0       2.433  32.732  12.436  3.95  1.00          C 0.00000
ATOM    623  C           0       2.123  34.211  12.140  3.95  1.00          C 0.00000
ATOM    624  C           0       1.928  35.083  13.394  3.75  1.00          C 0.00000
ATOM    625  O           0      11.180   5.350  14.712  3.05  1.00          O -.48200
ATOM    626  C           0      10.403   5.973  14.012  3.52  1.00          C 0.52500
ATOM    627  C           0      10.014   7.394  14.384  3.95  1.00          C -.04300
ATOM    628  C           0      10.525   7.877  15.755  3.95  1.00          C 0.00000
ATOM    629  C           0      10.194   9.346  16.076  3.95  1.00          C 0.00000
ATOM    630  C           0      10.677   9.801  17.466  3.95  1.00          C 0.00000
ATOM    631  C           0       9.632   9.298  18.480  3.95  1.00          C 0.00000
ATOM    632  C           0       8.496  10.317  18.687  3.75  1.00          C 0.00000
ATOM    633  O           0       6.081   7.204  19.083  3.05  1.00          O -.48200
ATOM    634  C           0       5.768   6.055  18.832  3.52  1.00          C 0.52500
ATOM    635  C           0       4.350   5.839  18.330  3.95  1.00          C -.04300
ATOM    636  C           0       3.630   7.166  18.026  3.95  1.00          C 0.00000
ATOM    637  C           0       2.118   6.950  17.823  3.95  1.00          C 0.00000
ATOM    638  C           0       1.696   6.225  16.532  3.95  1.00          C 0.00000
ATOM    639  C           0       0.208   6.535  16.284  3.95  1.00          C 0.00000
ATOM    640  C           0      -0.404   5.735  15.119  3.75  1.00          C 0.00000
ATOM    641  O           0       6.537  12.058  16.915  3.05  1.00          O -.48200
ATOM    642  C           0       5.705  12.774  16.389  3.52  1.00          C 0.52500
ATOM    643  C           0       4.542  12.087  15.691  3.95  1.00          C -.04300
ATOM    644  C           0       4.953  10.609  15.556  3.95  1.00          C 0.00000
ATOM    645  C           0       3.789   9.783  14.979  3.95  1.00          C 0.00000
ATOM    646  C           0       3.216  10.330  13.658  3.95  1.00          C 0.00000
ATOM    647  C           0       1.925   9.591  13.260  3.95  1.00          C 0.00000
ATOM    648  C           0       1.216  10.181  12.027  3.75  1.00          C 0.00000
ATOM    649  O           0       7.460  15.333  14.485  3.05  1.00          O -.48200
ATOM    650  C           0       8.376  15.811  13.843  3.52  1.00          C 0.52500
ATOM    651  C           0       9.462  16.669  14.471  3.95  1.00          C -.04300
ATOM    652  C           0      10.152  16.097  15.723  3.95  1.00          C 0.00000
ATOM    653  C           0      11.230  16.976  16.384  3.95  1.00          C 0.00000
ATOM    654  C           0      11.940  16.312  17.579  3.95  1.00          C 0.00000
ATOM    655  C           0      12.847  17.262  18.382  3.95  1.00          C 0.00000
ATOM    656  C           0      14.260  17.446  17.796  3.75  1.00          C 0.00000
ATOM    657  O           0       9.783  20.315  14.162  3.05  1.00          O -.48200
ATOM    658  C           0       9.439  20.584  15.298  3.52  1.00          C 0.52500
ATOM    659  C           0       8.384  21.642  15.576  3.95  1.00          C -.04300
ATOM    660  C           0       7.643  22.260  14.376  3.95  1.00          C 0.00000
ATOM    661  C           0       6.827  21.202  13.610  3.95  1.00          C 0.00000
ATOM    662  C           0       6.433  21.527  12.157  3.95  1.00          C 0.00000
ATOM    663  C           0       5.999  20.352  11.262  3.95  1.00          C 0.00000
ATOM    664  C           0       5.397  20.785   9.912  3.75  1.00          C 0.00000
ATOM    665  O           0       2.772  28.160  17.180  3.05  1.00          O -.48200
ATOM    666  C           0       3.821  28.336  16.590  3.52  1.00          C 0.52500
ATOM    667  C           0       5.088  27.563  16.917  3.95  1.00          C -.04300
ATOM    668  C           0       4.628  26.559  17.990  3.95  1.00          C 0.00000
ATOM    669  C           0       5.819  25.753  18.540  3.95  1.00          C 0.00000
ATOM    670  C           0       5.478  24.957  19.814  3.95  1.00          C 0.00000
ATOM    671  C           0       6.722  24.218  20.340  3.95  1.00          C 0.00000
ATOM    672  C           0       6.702  23.821  21.828  3.75  1.00          C 0.00000
ATOM    673  O           0       7.709   1.985  21.066  3.05  1.00          O -.48200
ATOM    674  C           0       8.579   2.680  20.575  3.52  1.00          C 0.52500
ATOM    675  C           0      10.055   2.357  20.737  3.95  1.00          C -.04300
ATOM    676  C           0      10.376   0.931  21.222  3.95  1.00          C 0.00000
ATOM    677  C           0      10.250  -0.075  20.063  3.95  1.00          C 0.00000
ATOM    678  C           0      11.109   0.201  18.815  3.95  1.00          C 0.00000
ATOM    679  C           0      11.016  -0.891  17.734  3.95  1.00          C 0.00000
ATOM    680  C           0      11.162  -0.229  16.351  3.75  1.00          C 0.00000
ATOM    681  O           0      16.260   6.053  14.608  3.05  1.00          O -.48200
ATOM    682  C           0      15.879   5.953  13.457  3.52  1.00          C 0.52500
ATOM    683  C           0      15.167   7.117  12.787  3.95  1.00          C -.04300
ATOM    684  C           0      15.174   8.436  13.581  3.95  1.00          C 0.00000
ATOM    685  C           0      14.008   9.329  13.118  3.95  1.00          C 0.00000
ATOM    686  C           0      13.858  10.658  13.882  3.95  1.00          C 0.00000
ATOM    687  C           0      12.518  11.296  13.472  3.95  1.00          C 0.00000
ATOM    688  C           0      12.224  12.619  14.202  3.75  1.00          C 0.00000
ATOM    689  O           0      16.045  15.489  14.849  3.05  1.00          O -.48200
ATOM    690  C           0      17.180  15.374  15.274  3.52  1.00          C 0.52500
ATOM    691  C           0      18.395  15.264  14.368  3.95  1.00          C -.04300
ATOM    692  C           0      19.716  15.614  15.079  3.95  1.00          C 0.00000
ATOM    693  C           0      19.941  14.639  16.249  3.95  1.00          C 0.00000
ATOM    694  C           0      21.293  14.539  16.981  3.95  1.00          C 0.00000
ATOM    695  C           0      21.299  13.640  18.231  3.95  1.00          C 0.00000
ATOM    696  C           0      22.785  13.648  18.636  3.75  1.00          C 0.00000
ATOM    697  O           0      10.702  20.962  10.398  3.05  1.00          O -.48200
ATOM    698  C           0      10.038  20.102  10.946  3.52  1.00          C 0.52500
ATOM    699  C           0      10.656  18.751  11.266  3.95  1.00          C -.04300
ATOM    700  C           0      12.094  18.714  10.715  3.95  1.00          C 0.00000
ATOM    701  C           0      12.907  17.443  11.024  3.95  1.00          C 0.00000
ATOM    702  C           0      14.361  17.498  10.518  3.95  1.00          C 0.00000
ATOM    703  C           0      15.367  16.344  10.686  3.95  1.00          C 0.00000
ATOM    704  C           0      16.845  16.722  10.476  3.75  1.00          C 0.00000
ATOM    705  O           0      10.456  24.874  12.090  3.05  1.00          O -.48200
ATOM    706  C           0      10.469  23.691  12.375  3.52  1.00          C 0.52500
ATOM    707  C           0      11.853  23.064  12.400  3.95  1.00          C -.04300
ATOM    708  C           0      13.014  24.001  12.018  3.95  1.00          C 0.00000
ATOM    709  C           0      14.388  23.326  11.847  3.95  1.00          C 0.00000
ATOM    710  C           0      15.481  24.411  11.837  3.95  1.00          C 0.00000
ATOM    711  C           0      15.026  25.603  10.975  3.95  1.00          C 0.00000
ATOM    712  C           0      16.271  26.447  10.644  3.75  1.00          C 0.00000
ATOM    713  O           0       8.124  25.048  15.568  3.05  1.00          O -.48200
ATOM    714  C           0       7.896  26.019  14.871  3.52  1.00          C 0.52500
ATOM    715  C           0       9.000  27.061  14.796  3.95  1.00          C -.04300
ATOM    716  C           0      10.257  26.560  15.530  3.95  1.00          C 0.00000
ATOM    717  C           0      11.543  27.300  15.118  3.95  1.00          C 0.00000
ATOM    718  C           0      11.398  28.834  15.120  3.95  1.00          C 0.00000
ATOM    719  C           0      12.693  29.667  15.134  3.95  1.00          C 0.00000
ATOM    720  C           0      12.341  31.145  15.382  3.75  1.00          C 0.00000
ATOM    721  O           0      12.483   4.765  18.938  3.05  1.00          O -.48200
ATOM    722  C           0      13.152   5.094  17.976  3.52  1.00          C 0.52500
ATOM    723  C           0      13.886   3.984  17.241  3.95  1.00          C -.04300
ATOM    724  C           0      13.593   2.508  17.572  3.95  1.00          C 0.00000
ATOM    725  C           0      14.675   1.553  17.034  3.95  1.00          C 0.00000
ATOM    726  C           0      14.675   0.120  17.598  3.95  1.00          C 0.00000
ATOM    727  C           0      15.231  -0.873  16.560  3.95  1.00          C 0.00000
ATOM    728  C           0      14.535  -0.863  15.187  3.75  1.00          C 0.00000
ATOM    729  O           0      23.325   7.834  14.435  3.05  1.00          O -.48200
ATOM    730  C           0      22.365   8.574  14.325  3.52  1.00          C 0.52500
ATOM    731  C           0      21.041   7.835  14.431  3.95  1.00          C -.04300
ATOM    732  C           0      21.140   6.316  14.659  3.95  1.00          C 0.00000
ATOM    733  C           0      19.803   5.590  14.898  3.95  1.00          C 0.00000
ATOM    734  C           0      20.111   4.129  15.273  3.95  1.00          C 0.00000
ATOM    735  C           0      18.854   3.308  15.616  3.95  1.00          C 0.00000
ATOM    736  C           0      19.097   1.800  15.804  3.75  1.00          C 0.00000
ATOM    737  O           0      16.968   6.855  18.586  3.05  1.00          O -.48200
ATOM    738  C           0      17.577   7.312  17.637  3.52  1.00          C 0.52500
ATOM    739  C           0      17.554   8.772  17.216  3.95  1.00          C -.04300
ATOM    740  C           0      16.362   9.449  17.918  3.95  1.00          C 0.00000
ATOM    741  C           0      16.379  10.982  17.769  3.95  1.00          C 0.00000
ATOM    742  C           0      15.139  11.740  18.278  3.95  1.00          C 0.00000
ATOM    743  C           0      15.234  13.267  18.107  3.95  1.00          C 0.00000
ATOM    744  C           0      16.498  13.828  18.785  3.75  1.00          C 0.00000
ATOM    745  O           0      20.889  19.127  15.119  3.05  1.00          O -.48200
ATOM    746  C           0      19.888  19.667  14.685  3.52  1.00          C 0.52500
ATOM    747  C           0      18.706  19.735  15.637  3.95  1.00          C -.04300
ATOM    748  C           0      19.097  19.334  17.072  3.95  1.00          C 0.00000
ATOM    749  C           0      17.910  19.196  18.042  3.95  1.00          C 0.00000
ATOM    750  C           0      18.379  18.835  19.463  3.95  1.00          C 0.00000
ATOM    751  C           0      19.039  17.452  19.612  3.95  1.00          C 0.00000
ATOM    752  C           0      19.610  17.290  21.033  3.75  1.00          C 0.00000
ATOM    753  O           0      26.151  25.448   9.913  3.05  1.00          O -.48200
ATOM    754  C           0      25.489  25.849   8.974  3.52  1.00          C 0.52500
ATOM    755  C           0      24.087  26.436   9.009  3.95  1.00          C -.04300
ATOM    756  C           0      23.487  26.843  10.368  3.95  1.00          C 0.00000
ATOM    757  C           0      21.992  27.212  10.418  3.95  1.00          C 0.00000
ATOM    758  C           0      21.630  27.765  11.809  3.95  1.00          C 0.00000
ATOM    759  C           0      20.203  28.338  11.882  3.95  1.00          C 0.00000
ATOM    760  C           0      19.825  28.985  13.228  3.75  1.00          C 0.00000
ATOM    761  O           0      16.085  30.974  10.084  3.05  1.00          O -.48200
ATOM    762  C           0      15.157  30.722  10.830  3.52  1.00          C 0.52500
ATOM    763  C           0      15.253  30.474  12.326  3.95  1.00          C -.04300
ATOM    764  C           0      16.492  31.077  13.014  3.95  1.00          C 0.00000
ATOM    765  C           0      16.441  30.900  14.543  3.95  1.00          C 0.00000
ATOM    766  C           0      17.435  31.868  15.211  3.95  1.00          C 0.00000
ATOM    767  C           0      17.362  32.327  16.680  3.95  1.00          C 0.00000
ATOM    768  C           0      18.511  33.284  17.049  3.75  1.00          C 0.00000
ATOM    769  O           0      27.682  34.120  16.109  3.05  1.00          O -.48200
ATOM    770  C           0      27.904  33.210  15.332  3.52  1.00          C 0.52500
ATOM    771  C           0      26.934  32.712  14.273  3.95  1.00          C -.04300
ATOM    772  C           0      25.490  33.233  14.401  3.95  1.00          C 0.00000
ATOM    773  C           0      24.598  33.040  13.161  3.95  1.00          C 0.00000
ATOM    774  C           0      23.084  33.264  13.329  3.95  1.00          C 0.00000
ATOM    775  C           0      22.227  32.709  12.176  3.95  1.00          C 0.00000
ATOM    776  C           0      20.757  32.980  12.546  3.75  1.00          C 0.00000
ATOM    777  O           0      22.829  10.627  21.260  3.05  1.00          O -.48200
ATOM    778  C           0      23.600  10.990  20.392  3.52  1.00          C 0.52500
ATOM    779  C           0      24.229  10.155  19.288  3.95  1.00          C -.04300
ATOM    780  C           0      23.816   8.673  19.336  3.95  1.00          C 0.00000
ATOM    781  C           0      24.635   7.714  18.452  3.95  1.00          C 0.00000
ATOM    782  C           0      24.000   6.518  17.719  3.95  1.00          C 0.00000
ATOM    783  C           0      24.960   5.497  17.079  3.95  1.00          C 0.00000
ATOM    784  C           0      24.633   3.994  17.010  3.75  1.00          C 0.00000
ATOM    785  O           0      30.375  11.942  17.063  3.05  1.00          O -.48200
ATOM    786  C           0      30.702  12.190  18.208  3.52  1.00          C 0.52500
ATOM    787  C           0      31.593  13.390  18.482  3.95  1.00          C -.04300
ATOM    788  C           0      32.367  14.098  17.354  3.95  1.00          C 0.00000
ATOM    789  C           0      33.412  13.128  16.772  3.95  1.00          C 0.00000
ATOM    790  C           0      34.507  12.718  17.774  3.95  1.00          C 0.00000
ATOM    791  C           0      35.726  12.041  17.122  3.95  1.00          C 0.00000
ATOM    792  C           0      36.717  11.314  18.050  3.75  1.00          C 0.00000
ATOM    793  O           0      22.843  17.086  18.427  3.05  1.00          O -.48200
ATOM    794  C           0      22.973  18.120  17.797  3.52  1.00          C 0.52500
ATOM    795  C           0      23.929  17.957  16.627  3.95  1.00          C -.04300
ATOM    796  C           0      24.517  16.534  16.663  3.95  1.00          C 0.00000
ATOM    797  C           0      25.368  16.290  15.403  3.95  1.00          C 0.00000
ATOM    798  C           0      25.981  14.877  15.394  3.95  1.00          C 0.00000
ATOM    799  C           0      27.020  14.656  14.278  3.95  1.00          C 0.00000
ATOM    800  C           0      28.311  15.345  14.756  3.75  1.00          C 0.00000
ATOM    801  O           0      23.671  22.619  11.279  3.05  1.00          O -.48200
ATOM    802  C           0      24.254  23.327  12.079  3.52  1.00          C 0.52500
ATOM    803  C           0      24.296  23.239  13.596  3.95  1.00          C -.04300
ATOM    804  C           0      23.150  22.523  14.334  3.95  1.00          C 0.00000
ATOM    805  C           0      23.230  22.620  15.869  3.95  1.00          C 0.00000
ATOM    806  C           0      21.980  22.197  16.663  3.95  1.00          C 0.00000
ATOM    807  C           0      22.141  22.174  18.194  3.95  1.00          C 0.00000
ATOM    808  C           0      21.013  21.800  19.174  3.75  1.00          C 0.00000
ATOM    809  O           0      29.216  29.817  16.669  3.05  1.00          O -.48200
ATOM    810  C           0      28.958  28.955  15.849  3.52  1.00          C 0.52500
ATOM    811  C           0      27.568  28.546  15.389  3.95  1.00          C -.04300
ATOM    812  C           0      26.412  29.102  16.242  3.95  1.00          C 0.00000
ATOM    813  C           0      25.083  29.091  15.465  3.95  1.00          C 0.00000
ATOM    814  C           0      23.961  29.753  16.286  3.95  1.00          C 0.00000
ATOM    815  C           0      22.598  29.961  15.599  3.95  1.00          C 0.00000
ATOM    816  C           0      21.495  30.486  16.536  3.75  1.00          C 0.00000
ATOM    817  O           0      29.387   8.560   8.841  3.05  1.00          O -.48200
ATOM    818  C           0      29.440   8.181   9.996  3.52  1.00          C 0.52500
ATOM    819  C           0      29.517   6.719  10.406  3.95  1.00          C -.04300
ATOM    820  C           0      28.642   5.880   9.456  3.95  1.00          C 0.00000
ATOM    821  C           0      28.803   4.370   9.711  3.95  1.00          C 0.00000
ATOM    822  C           0      28.077   3.532   8.643  3.95  1.00          C 0.00000
ATOM    823  C           0      28.376   2.021   8.638  3.95  1.00          C 0.00000
ATOM    824  C           0      27.672   1.069   9.623  3.75  1.00          C 0.00000
ATOM    825  O           0      25.649   6.843  11.565  3.05  1.00          O -.48200
ATOM    826  C           0      25.593   6.384  12.690  3.52  1.00          C 0.52500
ATOM    827  C           0      25.018   4.978  12.747  3.95  1.00          C -.04300
ATOM    828  C           0      24.265   4.637  11.447  3.95  1.00          C 0.00000
ATOM    829  C           0      24.229   3.108  11.266  3.95  1.00          C 0.00000
ATOM    830  C           0      23.121   2.550  10.352  3.95  1.00          C 0.00000
ATOM    831  C           0      22.801   1.064  10.601  3.95  1.00          C 0.00000
ATOM    832  C           0      22.825   0.612  12.073  3.75  1.00          C 0.00000
ATOM    833  O           0      27.626  11.281  19.114  3.05  1.00          O -.48200
ATOM    834  C           0      27.738  10.510  20.049  3.52  1.00          C 0.52500
ATOM    835  C           0      28.362   9.140  19.835  3.95  1.00          C -.04300
ATOM    836  C           0      28.645   8.827  18.354  3.95  1.00          C 0.00000
ATOM    837  C           0      28.649   7.354  17.905  3.95  1.00          C 0.00000
ATOM    838  C           0      28.855   7.208  16.385  3.95  1.00          C 0.00000
ATOM    839  C           0      28.468   5.868  15.734  3.95  1.00          C 0.00000
ATOM    840  C           0      29.083   5.773  14.325  3.75  1.00          C 0.00000
ATOM    841  O           0      30.317  26.846  13.218  3.05  1.00          O -.48200
ATOM    842  C           0      31.388  26.283  13.086  3.52  1.00          C 0.52500
ATOM    843  C           0      32.593  27.087  12.626  3.95  1.00          C -.04300
ATOM    844  C           0      32.281  28.490  12.073  3.95  1.00          C 0.00000
ATOM    845  C           0      33.547  29.356  11.933  3.95  1.00          C 0.00000
ATOM    846  C           0      33.354  30.699  11.204  3.95  1.00          C 0.00000
ATOM    847  C           0      34.468  31.637  11.704  3.95  1.00          C 0.00000
ATOM    848  C           0      34.301  33.136  11.395  3.75  1.00          C 0.00000
ATOM    849  O           0      35.996  28.037  14.976  3.05  1.00          O -.48200
ATOM    850  C           0      36.189  27.692  16.127  3.52  1.00          C 0.52500
ATOM    851  C           0      35.915  26.288  16.640  3.95  1.00          C -.04300
ATOM    852  C           0      35.518  25.273  15.551  3.95  1.00          C 0.00000
ATOM    853  C           0      35.130  23.834  15.941  3.95  1.00          C 0.00000
ATOM    854  C           0      34.605  22.918  14.820  3.95  1.00          C 0.00000
ATOM    855  C           0      33.260  23.315  14.185  3.95  1.00          C 0.00000
ATOM    856  C           0      32.626  22.286  13.232  3.75  1.00          C 0.00000
ATOM    857  O           0      31.254  32.737  13.780  3.05  1.00          O -.48200
ATOM    858  C           0      30.972  31.591  14.077  3.52  1.00          C 0.52500
ATOM    859  C           0      31.891  30.784  14.980  3.95  1.00          C -.04300
ATOM    860  C           0      33.125  31.592  15.423  3.95  1.00          C 0.00000
ATOM    861  C           0      34.034  30.838  16.412  3.95  1.00          C 0.00000
ATOM    862  C           0      35.141  31.735  16.996  3.95  1.00          C 0.00000
ATOM    863  C           0      36.279  31.979  15.987  3.95  1.00          C 0.00000
ATOM    864  C           0      37.283  33.002  16.550  3.75  1.00          C 0.00000
ATOM    865  O           0      37.113  33.542  20.284  3.05  1.00          O -.48200
ATOM    866  C           0      37.583  34.639  20.525  3.52  1.00          C 0.52500
ATOM    867  C           0      36.606  35.512  21.296  3.95  1.00          C -.04300
ATOM    868  C           0      35.292  34.735  21.502  3.95  1.00          C 0.00000
ATOM    869  C           0      34.336  35.620  22.322  3.95  1.00          C 0.00000
ATOM    870  C           0      34.717  36.170  23.710  3.95  1.00          C 0.00000
ATOM    871  C           0      33.757  37.218  24.303  3.95  1.00          C 0.00000
ATOM    872  C           0      34.248  37.864  25.612  3.75  1.00          C 0.00000
ATOM    873  O           0      36.218   3.888  23.496  3.05  1.00          O -.48200
ATOM    874  C           0      37.004   3.922  22.567  3.52  1.00          C 0.52500
ATOM    875  C           0      36.519   4.017  21.130  3.95  1.00          C -.04300
ATOM    876  C           0      35.023   4.192  20.807  3.95  1.00          C 0.00000
ATOM    877  C           0      34.639   4.251  19.316  3.95  1.00          C 0.00000
ATOM    878  C           0      33.123   4.147  19.066  3.95  1.00          C 0.00000
ATOM    879  C           0      32.711   4.110  17.583  3.95  1.00          C 0.00000
ATOM    880  C           0      31.188   3.892  17.527  3.75  1.00          C 0.00000
ATOM    881  O           0      33.401  20.108  21.162  3.05  1.00          O -.48200
ATOM    882  C           0      32.926  19.650  20.139  3.52  1.00          C 0.52500
ATOM    883  C           0      32.872  18.153  19.879  3.95  1.00          C -.04300
ATOM    884  C           0      33.858  17.432  20.816  3.95  1.00          C 0.00000
ATOM    885  C           0      33.758  15.904  20.656  3.95  1.00          C 0.00000
ATOM    886  C           0      34.545  15.189  21.770  3.95  1.00          C 0.00000
ATOM    887  C           0      34.769  13.710  21.406  3.95  1.00          C 0.00000
ATOM    888  C           0      35.931  13.034  22.158  3.75  1.00          C 0.00000
ATOM    889  O           0      31.217  23.559  16.794  3.05  1.00          O -.48200
ATOM    890  C           0      31.591  22.514  17.293  3.52  1.00          C 0.52500
ATOM    891  C           0      31.491  22.202  18.777  3.95  1.00          C -.04300
ATOM    892  C           0      31.012  23.340  19.697  3.95  1.00          C 0.00000
ATOM    893  C           0      30.644  23.010  21.155  3.95  1.00          C 0.00000
ATOM    894  C           0      30.814  24.188  22.133  3.95  1.00          C 0.00000
ATOM    895  C           0      30.142  24.021  23.509  3.95  1.00          C 0.00000
ATOM    896  C           0      30.482  25.217  24.418  3.75  1.00          C 0.00000
ATOM    897  O           0      36.549  28.964  24.992  3.05  1.00          O -.48200
ATOM    898  C           0      35.590  28.727  24.281  3.52  1.00          C 0.52500
ATOM    899  C           0      34.435  27.863  24.761  3.95  1.00          C -.04300
ATOM    900  C           0      34.305  27.939  26.294  3.95  1.00          C 0.00000
ATOM    901  C           0      32.992  27.449  26.932  3.95  1.00          C 0.00000
ATOM    902  C           0      33.134  27.418  28.465  3.95  1.00          C 0.00000
ATOM    903  C           0      31.903  27.369  29.389  3.95  1.00          C 0.00000
ATOM    904  C           0      32.128  27.090  30.887  3.75  1.00          C 0.00000
ATOM    905  O           0      -0.248  30.618  21.920  3.05  1.00          O -.48200
ATOM    906  C           0       0.001  30.335  20.763  3.52  1.00          C 0.52500
ATOM    907  C           0       0.149  28.965  20.122  3.95  1.00          C -.04300
ATOM    908  C           0       0.078  27.682  20.972  3.95  1.00          C 0.00000
ATOM    909  C           0       1.349  26.831  20.799  3.95  1.00          C 0.00000
ATOM    910  C           0       1.258  25.359  21.243  3.95  1.00          C 0.00000
ATOM    911  C           0       1.014  24.361  20.095  3.95  1.00          C 0.00000
ATOM    912  C           0       0.933  22.872  20.479  3.75  1.00          C 0.00000
ATOM    913  O           0       4.723  33.875  20.861  3.05  1.00          O -.48200
ATOM    914  C           0       5.606  33.955  21.694  3.52  1.00          C 0.52500
ATOM    915  C           0       7.015  34.153  21.161  3.95  1.00          C -.04300
ATOM    916  C           0       7.304  33.008  20.173  3.95  1.00          C 0.00000
ATOM    917  C           0       8.794  32.705  19.928  3.95  1.00          C 0.00000
ATOM    918  C           0       8.925  31.541  18.929  3.95  1.00          C 0.00000
ATOM    919  C           0       8.131  31.813  17.639  3.95  1.00          C 0.00000
ATOM    920  C           0       8.159  30.699  16.575  3.75  1.00          C 0.00000
ATOM    921  O           0      10.168  11.047  27.192  3.05  1.00          O -.48200
ATOM    922  C           0      10.052  11.757  26.210  3.52  1.00          C 0.52500
ATOM    923  C           0       9.538  11.139  24.920  3.95  1.00          C -.04300
ATOM    924  C           0       9.978   9.708  24.559  3.95  1.00          C 0.00000
ATOM    925  C           0       9.168   8.902  23.528  3.95  1.00          C 0.00000
ATOM    926  C           0       9.778   7.609  22.955  3.95  1.00          C 0.00000
ATOM    927  C           0       9.102   7.373  21.591  3.95  1.00          C 0.00000
ATOM    928  C           0       9.533   6.040  20.952  3.75  1.00          C 0.00000
ATOM    929  O           0       8.876  19.012  24.213  3.05  1.00          O -.48200
ATOM    930  C           0       9.779  18.197  24.187  3.52  1.00          C 0.52500
ATOM    931  C           0      10.225  17.348  23.008  3.95  1.00          C -.04300
ATOM    932  C           0       9.048  16.681  22.273  3.95  1.00          C 0.00000
ATOM    933  C           0       8.416  15.520  23.062  3.95  1.00          C 0.00000
ATOM    934  C           0       7.192  14.859  22.401  3.95  1.00          C 0.00000
ATOM    935  C           0       5.990  15.725  21.980  3.95  1.00          C 0.00000
ATOM    936  C           0       5.118  15.988  23.221  3.75  1.00          C 0.00000
ATOM    937  O           0       2.927  22.616  17.611  3.05  1.00          O -.48200
ATOM    938  C           0       4.058  22.806  17.205  3.52  1.00          C 0.52500
ATOM    939  C           0       5.228  21.924  17.610  3.95  1.00          C -.04300
ATOM    940  C           0       4.823  20.573  18.230  3.95  1.00          C 0.00000
ATOM    941  C           0       6.067  19.668  18.153  3.95  1.00          C 0.00000
ATOM    942  C           0       5.870  18.165  18.424  3.95  1.00          C 0.00000
ATOM    943  C           0       7.136  17.316  18.206  3.95  1.00          C 0.00000
ATOM    944  C           0       6.865  15.841  17.854  3.75  1.00          C 0.00000
ATOM    945  O           0       3.323  26.926  27.651  3.05  1.00          O -.48200
ATOM    946  C           0       2.559  27.182  26.740  3.52  1.00          C 0.52500
ATOM    947  C           0       2.097  26.052  25.835  3.95  1.00          C -.04300
ATOM    948  C           0       2.997  24.803  25.795  3.95  1.00          C 0.00000
ATOM    949  C           0       2.788  23.706  24.734  3.95  1.00          C 0.00000
ATOM    950  C           0       3.861  22.601  24.733  3.95  1.00          C 0.00000
ATOM    951  C           0       3.864  21.516  23.640  3.95  1.00          C 0.00000
ATOM    952  C           0       5.133  20.648  23.559  3.75  1.00          C 0.00000
ATOM    953  O           0       4.605  30.778  17.933  3.05  1.00          O -.48200
ATOM    954  C           0       3.822  31.218  18.755  3.52  1.00          C 0.52500
ATOM    955  C           0       3.638  30.819  20.210  3.95  1.00          C -.04300
ATOM    956  C           0       4.794  29.899  20.645  3.95  1.00          C 0.00000
ATOM    957  C           0       4.449  29.195  21.971  3.95  1.00          C 0.00000
ATOM    958  C           0       5.322  27.972  22.303  3.95  1.00          C 0.00000
ATOM    959  C           0       4.977  27.407  23.694  3.95  1.00          C 0.00000
ATOM    960  C           0       5.939  26.353  24.272  3.75  1.00          C 0.00000
ATOM    961  O           0      12.189  35.800  24.151  3.05  1.00          O -.48200
ATOM    962  C           0      13.359  35.518  24.331  3.52  1.00          C 0.52500
ATOM    963  C           0      14.029  34.336  23.649  3.95  1.00          C -.04300
ATOM    964  C           0      13.076  33.704  22.616  3.95  1.00          C 0.00000
ATOM    965  C           0      13.645  32.511  21.827  3.95  1.00          C 0.00000
ATOM    966  C           0      12.736  31.792  20.813  3.95  1.00          C 0.00000
ATOM    967  C           0      13.450  30.646  20.074  3.95  1.00          C 0.00000
ATOM    968  C           0      12.561  29.671  19.279  3.75  1.00          C 0.00000
ATOM    969  O           0      13.081   8.769  20.395  3.05  1.00          O -.48200
ATOM    970  C           0      13.750   7.804  20.714  3.52  1.00          C 0.52500
ATOM    971  C           0      15.158   7.627  21.258  3.95  1.00          C -.04300
ATOM    972  C           0      15.989   8.844  21.705  3.95  1.00          C 0.00000
ATOM    973  C           0      17.462   8.510  22.006  3.95  1.00          C 0.00000
ATOM    974  C           0      18.201   9.756  22.528  3.95  1.00          C 0.00000
ATOM    975  C           0      18.601  10.921  21.605  3.95  1.00          C 0.00000
ATOM    976  C           0      19.452  11.947  22.376  3.75  1.00          C 0.00000
ATOM    977  O           0      12.642  14.526  26.368  3.05  1.00          O -.48200
ATOM    978  C           0      12.997  14.972  27.443  3.52  1.00          C 0.52500
ATOM    979  C           0      13.477  16.411  27.548  3.95  1.00          C -.04300
ATOM    980  C           0      13.412  17.064  26.155  3.95  1.00          C 0.00000
ATOM    981  C           0      13.603  18.590  26.071  3.95  1.00          C 0.00000
ATOM    982  C           0      13.709  19.151  24.641  3.95  1.00          C 0.00000
ATOM    983  C           0      14.988  18.910  23.818  3.95  1.00          C 0.00000
ATOM    984  C           0      14.887  19.357  22.348  3.75  1.00          C 0.00000
ATOM    985  O           0      13.695  22.454  26.177  3.05  1.00          O -.48200
ATOM    986  C           0      14.198  22.976  25.199  3.52  1.00          C 0.52500
ATOM    987  C           0      13.177  23.683  24.324  3.95  1.00          C -.04300
ATOM    988  C           0      11.751  23.285  24.749  3.95  1.00          C 0.00000
ATOM    989  C           0      10.597  24.139  24.193  3.95  1.00          C 0.00000
ATOM    990  C           0       9.240  23.886  24.876  3.95  1.00          C 0.00000
ATOM    991  C           0       8.747  22.427  24.880  3.95  1.00          C 0.00000
ATOM    992  C           0       7.459  22.326  25.717  3.75  1.00          C 0.00000
ATOM    993  O           0      13.210  23.303  16.254  3.05  1.00          O -.48200
ATOM    994  C           0      14.264  22.722  16.434  3.52  1.00          C 0.52500
ATOM    995  C           0      14.660  21.639  17.425  3.95  1.00          C -.04300
ATOM    996  C           0      13.672  21.489  18.597  3.95  1.00          C 0.00000
ATOM    997  C           0      12.283  20.973  18.177  3.95  1.00          C 0.00000
ATOM    998  C           0      11.390  20.746  19.410  3.95  1.00          C 0.00000
ATOM    999  C           0       9.967  20.289  19.038  3.95  1.00          C 0.00000
ATOM   1000  C           0       8.974  20.633  20.164  3.75  1.00          C 0.00000
ATOM   1001  O           0      13.619  28.661  23.712  3.05  1.00          O -.48200
ATOM   1002  C           0      14.653  28.121  23.368  3.52  1.00          C 0.52500
ATOM   1003  C           0      14.708  27.025  22.316  3.95  1.00          C -.04300
ATOM   1004  C           0      13.449  26.582  21.547  3.95  1.00          C 0.00000
ATOM   1005  C           0      13.568  25.781  20.237  3.95  1.00          C 0.00000
ATOM   1006  C           0      12.294  25.067  19.749  3.95  1.00          C 0.00000
ATOM   1007  C           0      11.106  26.011  19.487  3.95  1.00          C 0.00000
ATOM   1008  C           0       9.866  25.310  18.902  3.75  1.00          C 0.00000
ATOM   1009  O           0      21.002  32.254  20.627  3.05  1.00          O -.48200
ATOM   1010  C           0      21.220  33.109  21.466  3.52  1.00          C 0.52500
ATOM   1011  C           0      20.120  33.999  22.022  3.95  1.00          C -.04300
ATOM   1012  C           0      18.814  33.912  21.211  3.95  1.00          C 0.00000
ATOM   1013  C           0      17.843  35.070  21.508  3.95  1.00          C 0.00000
ATOM   1014  C           0      18.156  36.385  20.771  3.95  1.00          C 0.00000
ATOM   1015  C           0      16.999  37.391  20.916  3.95  1.00          C 0.00000
ATOM   1016  C           0      17.332  38.890  20.803  3.75  1.00          C 0.00000
ATOM   1017  O           0      20.574   7.842  18.779  3.05  1.00          O -.48200
ATOM   1018  C           0      20.584   7.889  19.995  3.52  1.00          C 0.52500
ATOM   1019  C           0      20.452   6.624  20.828  3.95  1.00          C -.04300
ATOM   1020  C           0      19.663   5.493  20.144  3.95  1.00          C 0.00000
ATOM   1021  C           0      20.605   4.551  19.372  3.95  1.00          C 0.00000
ATOM   1022  C           0      21.498   3.663  20.258  3.95  1.00          C 0.00000
ATOM   1023  C           0      22.041   2.401  19.563  3.95  1.00          C 0.00000
ATOM   1024  C           0      22.407   1.319  20.595  3.75  1.00          C 0.00000
ATOM   1025  O           0      17.953  10.066  32.735  3.05  1.00          O -.48200
ATOM   1026  C           0      17.057   9.488  32.148  3.52  1.00          C 0.52500
ATOM   1027  C           0      16.236  10.116  31.033  3.95  1.00          C -.04300
ATOM   1028  C           0      16.444  11.634  30.881  3.95  1.00          C 0.00000
ATOM   1029  C           0      15.811  12.190  29.592  3.95  1.00          C 0.00000
ATOM   1030  C           0      16.165  13.664  29.319  3.95  1.00          C 0.00000
ATOM   1031  C           0      16.119  14.750  30.410  3.95  1.00          C 0.00000
ATOM   1032  C           0      16.499  16.165  29.937  3.75  1.00          C 0.00000
ATOM   1033  O           0      23.054  25.376  23.977  3.05  1.00          O -.48200
ATOM   1034  C           0      22.041  26.037  24.111  3.52  1.00          C 0.52500
ATOM   1035  C           0      20.671  25.428  23.862  3.95  1.00          C -.04300
ATOM   1036  C           0      20.626  23.891  23.776  3.95  1.00          C 0.00000
ATOM   1037  C           0      19.174  23.415  23.588  3.95  1.00          C 0.00000
ATOM   1038  C           0      18.660  23.582  22.146  3.95  1.00          C 0.00000
ATOM   1039  C           0      17.221  23.054  21.999  3.95  1.00          C 0.00000
ATOM   1040  C           0      16.881  23.094  20.497  3.75  1.00          C 0.00000
ATOM   1041  O           0      20.032  26.533  20.169  3.05  1.00          O -.48200
ATOM   1042  C           0      21.147  26.957  19.930  3.52  1.00          C 0.52500
ATOM   1043  C           0      21.600  26.963  18.479  3.95  1.00          C -.04300
ATOM   1044  C           0      20.579  26.208  17.608  3.95  1.00          C 0.00000
ATOM   1045  C           0      21.048  25.855  16.184  3.95  1.00          C 0.00000
ATOM   1046  C           0      20.050  24.933  15.459  3.95  1.00          C 0.00000
ATOM   1047  C           0      20.344  24.899  13.948  3.95  1.00          C 0.00000
ATOM   1048  C           0      19.312  24.090  13.140  3.75  1.00          C 0.00000
ATOM   1049  O           0      17.113  29.490  21.910  3.05  1.00          O -.48200
ATOM   1050  C           0      17.968  30.194  21.405  3.52  1.00          C 0.52500
ATOM   1051  C           0      18.138  30.043  19.902  3.95  1.00          C -.04300
ATOM   1052  C           0      17.341  28.872  19.297  3.95  1.00          C 0.00000
ATOM   1053  C           0      17.332  28.636  17.775  3.95  1.00          C 0.00000
ATOM   1054  C           0      16.712  27.317  17.278  3.95  1.00          C 0.00000
ATOM   1055  C           0      16.791  27.191  15.746  3.95  1.00          C 0.00000
ATOM   1056  C           0      16.128  25.860  15.345  3.75  1.00          C 0.00000
ATOM   1057  O           0      24.080  33.287  22.227  3.05  1.00          O -.48200
ATOM   1058  C           0      25.270  33.326  22.477  3.52  1.00          C 0.52500
ATOM   1059  C           0      26.300  33.308  21.359  3.95  1.00          C -.04300
ATOM   1060  C           0      25.704  33.058  19.961  3.95  1.00          C 0.00000
ATOM   1061  C           0      24.706  34.090  19.403  3.95  1.00          C 0.00000
ATOM   1062  C           0      24.339  33.703  17.959  3.95  1.00          C 0.00000
ATOM   1063  C           0      23.441  34.789  17.338  3.95  1.00          C 0.00000
ATOM   1064  C           0      22.005  34.738  17.891  3.75  1.00          C 0.00000
ATOM   1065  O           0      32.460   5.783  25.264  3.05  1.00          O -.48200
ATOM   1066  C           0      32.868   5.309  24.219  3.52  1.00          C 0.52500
ATOM   1067  C           0      32.152   4.677  23.037  3.95  1.00          C -.04300
ATOM   1068  C           0      30.686   5.105  22.841  3.95  1.00          C 0.00000
ATOM   1069  C           0      29.920   4.402  21.705  3.95  1.00          C 0.00000
ATOM   1070  C           0      28.442   4.775  21.485  3.95  1.00          C 0.00000
ATOM   1071  C           0      27.663   4.010  20.399  3.95  1.00          C 0.00000
ATOM   1072  C           0      26.173   4.397  20.454  3.75  1.00          C 0.00000
ATOM   1073  O           0      25.991  10.474  22.492  3.05  1.00          O -.48200
ATOM   1074  C           0      26.075  10.316  23.696  3.52  1.00          C 0.52500
ATOM   1075  C           0      25.963  11.448  24.704  3.95  1.00          C -.04300
ATOM   1076  C           0      25.043  12.593  24.241  3.95  1.00          C 0.00000
ATOM   1077  C           0      25.762  13.592  23.316  3.95  1.00          C 0.00000
ATOM   1078  C           0      24.787  14.728  22.953  3.95  1.00          C 0.00000
ATOM   1079  C           0      23.388  14.296  22.477  3.95  1.00          C 0.00000
ATOM   1080  C           0      22.407  15.378  21.990  3.75  1.00          C 0.00000
ATOM   1081  O           0      25.852  17.533  26.556  3.05  1.00          O -.48200
ATOM   1082  C           0      26.022  17.620  25.354  3.52  1.00          C 0.52500
ATOM   1083  C           0      24.998  18.285  24.448  3.95  1.00          C -.04300
ATOM   1084  C           0      23.803  18.705  25.323  3.95  1.00          C 0.00000
ATOM   1085  C           0      22.617  19.227  24.491  3.95  1.00          C 0.00000
ATOM   1086  C           0      21.238  19.186  25.174  3.95  1.00          C 0.00000
ATOM   1087  C           0      20.157  19.498  24.122  3.95  1.00          C 0.00000
ATOM   1088  C           0      18.795  19.597  24.834  3.75  1.00          C 0.00000
ATOM   1089  O           0      23.892  24.776  20.650  3.05  1.00          O -.48200
ATOM   1090  C           0      23.505  23.782  21.236  3.52  1.00          C 0.52500
ATOM   1091  C           0      24.319  22.505  21.106  3.95  1.00          C -.04300
ATOM   1092  C           0      25.801  22.705  21.475  3.95  1.00          C 0.00000
ATOM   1093  C           0      26.653  21.491  21.060  3.95  1.00          C 0.00000
ATOM   1094  C           0      26.596  21.277  19.536  3.95  1.00          C 0.00000
ATOM   1095  C           0      26.697  19.813  19.067  3.95  1.00          C 0.00000
ATOM   1096  C           0      26.758  19.787  17.528  3.75  1.00          C 0.00000
ATOM   1097  O           0      27.475  26.589  22.527  3.05  1.00          O -.48200
ATOM   1098  C           0      27.006  27.462  21.821  3.52  1.00          C 0.52500
ATOM   1099  C           0      26.851  27.319  20.315  3.95  1.00          C -.04300
ATOM   1100  C           0      27.390  25.963  19.823  3.95  1.00          C 0.00000
ATOM   1101  C           0      27.526  25.904  18.290  3.95  1.00          C 0.00000
ATOM   1102  C           0      27.920  24.569  17.630  3.95  1.00          C 0.00000
ATOM   1103  C           0      27.775  24.593  16.097  3.95  1.00          C 0.00000
ATOM   1104  C           0      27.438  23.202  15.528  3.75  1.00          C 0.00000
ATOM   1105  O           0      29.181  35.458  24.525  3.05  1.00          O -.48200
ATOM   1106  C           0      29.920  36.199  23.903  3.52  1.00          C 0.52500
ATOM   1107  C           0      30.502  35.902  22.531  3.95  1.00          C -.04300
ATOM   1108  C           0      30.101  34.467  22.141  3.95  1.00          C 0.00000
ATOM   1109  C           0      30.431  34.234  20.655  3.95  1.00          C 0.00000
ATOM   1110  C           0      29.561  35.090  19.716  3.95  1.00          C 0.00000
ATOM   1111  C           0      30.054  35.499  18.315  3.95  1.00          C 0.00000
ATOM   1112  C           0      29.438  36.788  17.738  3.75  1.00          C 0.00000
ATOM   1113  O           0      31.926   9.743  19.646  3.05  1.00          O -.48200
ATOM   1114  C           0      32.447   8.687  19.338  3.52  1.00          C 0.52500
ATOM   1115  C           0      33.747   8.176  19.937  3.95  1.00          C -.04300
ATOM   1116  C           0      34.455   9.141  20.905  3.95  1.00          C 0.00000
ATOM   1117  C           0      35.349   8.323  21.854  3.95  1.00          C 0.00000
ATOM   1118  C           0      36.073   9.132  22.947  3.95  1.00          C 0.00000
ATOM   1119  C           0      37.072   8.333  23.804  3.95  1.00          C 0.00000
ATOM   1120  C           0      37.258   8.988  25.185  3.75  1.00          C 0.00000
ATOM   1121  O           0      27.748  14.793  25.379  3.05  1.00          O -.48200
ATOM   1122  C           0      28.712  14.303  25.936  3.52  1.00          C 0.52500
ATOM   1123  C           0      29.817  13.733  25.062  3.95  1.00          C -.04300
ATOM   1124  C           0      29.435  13.282  23.640  3.95  1.00          C 0.00000
ATOM   1125  C           0      30.542  12.872  22.652  3.95  1.00          C 0.00000
ATOM   1126  C           0      31.238  11.552  23.031  3.95  1.00          C 0.00000
ATOM   1127  C           0      30.258  10.403  22.731  3.95  1.00          C 0.00000
ATOM   1128  C           0      30.740   9.159  23.501  3.75  1.00          C 0.00000
ATOM   1129  O           0      28.380  15.552  18.337  3.05  1.00          O -.48200
ATOM   1130  C           0      27.714  14.811  19.036  3.52  1.00          C 0.52500
ATOM   1131  C           0      27.645  15.088  20.529  3.95  1.00          C -.04300
ATOM   1132  C           0      28.733  16.066  21.009  3.95  1.00          C 0.00000
ATOM   1133  C           0      28.450  16.784  22.342  3.95  1.00          C 0.00000
ATOM   1134  C           0      29.627  17.696  22.736  3.95  1.00          C 0.00000
ATOM   1135  C           0      29.331  18.589  23.955  3.95  1.00          C 0.00000
ATOM   1136  C           0      30.248  19.778  24.296  3.75  1.00          C 0.00000
ATOM   1137  O           0      32.484  23.022  28.596  3.05  1.00          O -.48200
ATOM   1138  C           0      31.901  24.090  28.604  3.52  1.00          C 0.52500
ATOM   1139  C           0      30.468  24.180  28.105  3.95  1.00          C -.04300
ATOM   1140  C           0      29.842  22.775  28.019  3.95  1.00          C 0.00000
ATOM   1141  C           0      28.552  22.665  27.185  3.95  1.00          C 0.00000
ATOM   1142  C           0      27.879  21.284  27.076  3.95  1.00          C 0.00000
ATOM   1143  C           0      26.594  21.055  26.258  3.95  1.00          C 0.00000
ATOM   1144  C           0      26.812  21.379  24.768  3.75  1.00          C 0.00000
ATOM   1145  O           0      29.042  30.858  20.882  3.05  1.00          O -.48200
ATOM   1146  C           0      29.501  30.416  21.919  3.52  1.00          C 0.52500
ATOM   1147  C           0      30.441  29.221  21.939  3.95  1.00          C -.04300
ATOM   1148  C           0      30.930  28.741  20.559  3.95  1.00          C 0.00000
ATOM   1149  C           0      31.947  27.597  20.724  3.95  1.00          C 0.00000
ATOM   1150  C           0      32.565  27.181  19.376  3.95  1.00          C 0.00000
ATOM   1151  C           0      31.479  27.148  18.284  3.95  1.00          C 0.00000
ATOM   1152  C           0      31.958  26.895  16.843  3.75  1.00          C 0.00000
ATOM   1153  O           0      32.836  32.251  23.560  3.05  1.00          O -.48200
ATOM   1154  C           0      32.310  33.081  24.278  3.52  1.00          C 0.52500
ATOM   1155  C           0      32.634  32.992  25.760  3.95  1.00          C -.04300
ATOM   1156  C           0      32.751  31.561  26.316  3.95  1.00          C 0.00000
ATOM   1157  C           0      32.671  31.465  27.851  3.95  1.00          C 0.00000
ATOM   1158  C           0      33.622  32.284  28.744  3.95  1.00          C 0.00000
ATOM   1159  C           0      33.149  32.501  30.194  3.95  1.00          C 0.00000
ATOM   1160  C           0      34.192  33.309  30.988  3.75  1.00          C 0.00000
ATOM   1161  O           0      33.291  14.064  30.236  3.05  1.00          O -.48200
ATOM   1162  C           0      33.385  13.415  31.261  3.52  1.00          C 0.52500
ATOM   1163  C           0      34.424  12.312  31.378  3.95  1.00          C -.04300
ATOM   1164  C           0      35.033  11.783  30.067  3.95  1.00          C 0.00000
ATOM   1165  C           0      36.210  10.805  30.240  3.95  1.00          C 0.00000
ATOM   1166  C           0      36.723  10.329  28.868  3.95  1.00          C 0.00000
ATOM   1167  C           0      38.098   9.643  28.970  3.95  1.00          C 0.00000
ATOM   1168  C           0      39.377  10.502  28.971  3.75  1.00          C 0.00000
ATOM   1169  O           0      30.958  17.770  28.841  3.05  1.00          O -.48200
ATOM   1170  C           0      31.781  18.503  28.324  3.52  1.00          C 0.52500
ATOM   1171  C           0      32.663  18.048  27.173  3.95  1.00          C -.04300
ATOM   1172  C           0      32.474  16.543  26.903  3.95  1.00          C 0.00000
ATOM   1173  C           0      33.593  15.766  26.186  3.95  1.00          C 0.00000
ATOM   1174  C           0      33.646  14.235  26.349  3.95  1.00          C 0.00000
ATOM   1175  C           0      34.933  13.625  25.762  3.95  1.00          C 0.00000
ATOM   1176  C           0      35.158  12.114  25.955  3.75  1.00          C 0.00000
ATOM   1177  O           0      -0.297  20.827  30.198  3.05  1.00          O -.48200
ATOM   1178  C           0      -0.872  21.895  30.102  3.52  1.00          C 0.52500
ATOM   1179  C           0      -0.118  23.184  29.821  3.95  1.00          C -.04300
ATOM   1180  C           0       1.264  23.017  29.161  3.95  1.00          C 0.00000
ATOM   1181  C           0       2.175  24.247  29.336  3.95  1.00          C 0.00000
ATOM   1182  C           0       2.820  24.454  30.719  3.95  1.00          C 0.00000
ATOM   1183  C           0       3.758  25.656  30.936  3.95  1.00          C 0.00000
ATOM   1184  C           0       4.365  25.691  32.350  3.75  1.00          C 0.00000
ATOM   1185  O           0      33.520  23.588  32.760  3.05  1.00          O -.48200
ATOM   1186  C           0      33.571  24.344  33.712  3.52  1.00          C 0.52500
ATOM   1187  C           0      34.571  25.483  33.829  3.95  1.00          C -.04300
ATOM   1188  C           0      35.224  25.704  32.452  3.95  1.00          C 0.00000
ATOM   1189  C           0      36.148  26.933  32.372  3.95  1.00          C 0.00000
ATOM   1190  C           0      36.265  27.519  30.952  3.95  1.00          C 0.00000
ATOM   1191  C           0      37.178  28.742  30.750  3.95  1.00          C 0.00000
ATOM   1192  C           0      36.755  29.535  29.499  3.75  1.00          C 0.00000
ATOM   1193  O           0       7.463  30.766  28.197  3.05  1.00          O -.48200
ATOM   1194  C           0       6.866  29.710  28.292  3.52  1.00          C 0.52500
ATOM   1195  C           0       5.658  29.508  27.390  3.95  1.00          C -.04300
ATOM   1196  C           0       5.085  30.851  26.900  3.95  1.00          C 0.00000
ATOM   1197  C           0       3.849  30.693  25.995  3.95  1.00          C 0.00000
ATOM   1198  C           0       3.711  32.003  25.197  3.95  1.00          C 0.00000
ATOM   1199  C           0       2.571  31.879  24.169  3.95  1.00          C 0.00000
ATOM   1200  C           0       2.149  33.185  23.471  3.75  1.00          C 0.00000
ATOM   1201  O           0       3.968   3.369  21.103  3.05  1.00          O -.48200
ATOM   1202  C           0       4.718   2.422  20.959  3.52  1.00          C 0.52500
ATOM   1203  C           0       4.494   1.097  21.669  3.95  1.00          C -.04300
ATOM   1204  C           0       3.730   1.215  23.001  3.95  1.00          C 0.00000
ATOM   1205  C           0       4.237   2.381  23.870  3.95  1.00          C 0.00000
ATOM   1206  C           0       3.415   2.500  25.167  3.95  1.00          C 0.00000
ATOM   1207  C           0       3.974   3.375  26.305  3.95  1.00          C 0.00000
ATOM   1208  C           0       3.118   3.487  27.580  3.75  1.00          C 0.00000
ATOM   1209  O           0       7.487   4.941  30.396  3.05  1.00          O -.48200
ATOM   1210  C           0       8.203   5.095  29.424  3.52  1.00          C 0.52500
ATOM   1211  C           0       7.730   5.707  28.115  3.95  1.00          C -.04300
ATOM   1212  C           0       6.202   5.732  27.921  3.95  1.00          C 0.00000
ATOM   1213  C           0       5.872   6.743  26.807  3.95  1.00          C 0.00000
ATOM   1214  C           0       6.469   6.266  25.470  3.95  1.00          C 0.00000
ATOM   1215  C           0       5.449   6.394  24.323  3.95  1.00          C 0.00000
ATOM   1216  C           0       5.940   5.899  22.950  3.75  1.00          C 0.00000
ATOM   1217  O           0       5.916  13.139  26.617  3.05  1.00          O -.48200
ATOM   1218  C           0       4.842  13.229  26.052  3.52  1.00          C 0.52500
ATOM   1219  C           0       4.300  12.345  24.941  3.95  1.00          C -.04300
ATOM   1220  C           0       5.046  11.012  24.744  3.95  1.00          C 0.00000
ATOM   1221  C           0       4.423  10.118  23.656  3.95  1.00          C 0.00000
ATOM   1222  C           0       4.291  10.951  22.367  3.95  1.00          C 0.00000
ATOM   1223  C           0       4.122  10.184  21.042  3.95  1.00          C 0.00000
ATOM   1224  C           0       4.235  11.021  19.754  3.75  1.00          C 0.00000
ATOM   1225  O           0      34.737  24.368  24.759  3.05  1.00          O -.48200
ATOM   1226  C           0      34.165  23.540  24.074  3.52  1.00          C 0.52500
ATOM   1227  C           0      34.312  22.045  24.303  3.95  1.00          C -.04300
ATOM   1228  C           0      35.684  21.359  24.447  3.95  1.00          C 0.00000
ATOM   1229  C           0      35.550  19.846  24.700  3.95  1.00          C 0.00000
ATOM   1230  C           0      36.793  19.004  24.359  3.95  1.00          C 0.00000
ATOM   1231  C           0      37.062  19.300  22.872  3.95  1.00          C 0.00000
ATOM   1232  C           0      38.135  18.380  22.260  3.75  1.00          C 0.00000
ATOM   1233  O           0       8.572  21.381  31.922  3.05  1.00          O -.48200
ATOM   1234  C           0       7.999  22.446  31.780  3.52  1.00          C 0.52500
ATOM   1235  C           0       6.820  22.488  30.822  3.95  1.00          C -.04300
ATOM   1236  C           0       6.406  21.097  30.305  3.95  1.00          C 0.00000
ATOM   1237  C           0       5.190  21.042  29.361  3.95  1.00          C 0.00000
ATOM   1238  C           0       4.790  19.615  28.942  3.95  1.00          C 0.00000
ATOM   1239  C           0       3.593  19.367  28.005  3.95  1.00          C 0.00000
ATOM   1240  C           0       3.493  18.000  27.302  3.75  1.00          C 0.00000
ATOM   1241  O           0       6.564  33.784  24.847  3.05  1.00          O -.48200
ATOM   1242  C           0       7.681  33.943  25.302  3.52  1.00          C 0.52500
ATOM   1243  C           0       8.827  33.137  24.712  3.95  1.00          C -.04300
ATOM   1244  C           0       8.332  31.723  24.354  3.95  1.00          C 0.00000
ATOM   1245  C           0       9.488  30.777  23.979  3.95  1.00          C 0.00000
ATOM   1246  C           0       8.978  29.395  23.531  3.95  1.00          C 0.00000
ATOM   1247  C           0       9.966  28.513  22.744  3.95  1.00          C 0.00000
ATOM   1248  C           0       9.350  27.173  22.301  3.75  1.00          C 0.00000
ATOM   1249  O           0      11.764   3.327  34.708  3.05  1.00          O -.48200
ATOM   1250  C           0      10.994   4.064  34.120  3.52  1.00          C 0.52500
ATOM   1251  C           0      10.738   3.800  32.645  3.95  1.00          C -.04300
ATOM   1252  C           0      11.278   2.443  32.155  3.95  1.00          C 0.00000
ATOM   1253  C           0      11.197   2.212  30.634  3.95  1.00          C 0.00000
ATOM   1254  C           0      11.706   0.801  30.286  3.95  1.00          C 0.00000
ATOM   1255  C           0      11.794   0.508  28.777  3.95  1.00          C 0.00000
ATOM   1256  C           0      10.491   0.808  28.011  3.75  1.00          C 0.00000
ATOM   1257  O           0      11.074   6.328  29.055  3.05  1.00          O -.48200
ATOM   1258  C           0      11.404   6.857  28.011  3.52  1.00          C 0.52500
ATOM   1259  C           0      11.277   6.095  26.702  3.95  1.00          C -.04300
ATOM   1260  C           0      11.005   4.583  26.802  3.95  1.00          C 0.00000
ATOM   1261  C           0      10.925   3.872  25.439  3.95  1.00          C 0.00000
ATOM   1262  C           0      12.188   3.984  24.566  3.95  1.00          C 0.00000
ATOM   1263  C           0      12.321   3.041  23.356  3.95  1.00          C 0.00000
ATOM   1264  C           0      13.460   3.511  22.431  3.75  1.00          C 0.00000
ATOM   1265  O           0      14.198   9.068  25.245  3.05  1.00          O -.48200
ATOM   1266  C           0      13.935  10.127  25.783  3.52  1.00          C 0.52500
ATOM   1267  C           0      13.749  11.453  25.062  3.95  1.00          C -.04300
ATOM   1268  C           0      13.570  11.444  23.532  3.95  1.00          C 0.00000
ATOM   1269  C           0      13.437  12.719  22.678  3.95  1.00          C 0.00000
ATOM   1270  C           0      12.433  13.810  23.094  3.95  1.00          C 0.00000
ATOM   1271  C           0      12.477  14.909  22.016  3.95  1.00          C 0.00000
ATOM   1272  C           0      11.777  14.562  20.689  3.75  1.00          C 0.00000
ATOM   1273  O           0      12.276  22.392  29.154  3.05  1.00          O -.48200
ATOM   1274  C           0      11.497  22.250  28.229  3.52  1.00          C 0.52500
ATOM   1275  C           0      11.061  20.845  27.847  3.95  1.00          C -.04300
ATOM   1276  C           0      11.310  19.794  28.945  3.95  1.00          C 0.00000
ATOM   1277  C           0      10.774  18.366  28.737  3.95  1.00          C 0.00000
ATOM   1278  C           0       9.268  18.113  28.933  3.95  1.00          C 0.00000
ATOM   1279  C           0       8.857  16.662  28.619  3.95  1.00          C 0.00000
ATOM   1280  C           0       7.405  16.488  29.103  3.75  1.00          C 0.00000
ATOM   1281  O           0      16.056  25.996  25.388  3.05  1.00          O -.48200
ATOM   1282  C           0      15.993  25.577  26.529  3.52  1.00          C 0.52500
ATOM   1283  C           0      15.252  26.309  27.635  3.95  1.00          C -.04300
ATOM   1284  C           0      14.135  27.285  27.220  3.95  1.00          C 0.00000
ATOM   1285  C           0      12.685  26.899  26.875  3.95  1.00          C 0.00000
ATOM   1286  C           0      11.923  28.236  26.828  3.95  1.00          C 0.00000
ATOM   1287  C           0      10.423  28.020  26.554  3.95  1.00          C 0.00000
ATOM   1288  C           0       9.624  27.221  27.600  3.75  1.00          C 0.00000
ATOM   1289  O           0      12.885  33.874  32.849  3.05  1.00          O -.48200
ATOM   1290  C           0      13.708  34.429  32.145  3.52  1.00          C 0.52500
ATOM   1291  C           0      14.826  33.746  31.374  3.95  1.00          C -.04300
ATOM   1292  C           0      14.451  32.362  30.812  3.95  1.00          C 0.00000
ATOM   1293  C           0      15.447  31.676  29.858  3.95  1.00          C 0.00000
ATOM   1294  C           0      16.176  32.755  29.036  3.95  1.00          C 0.00000
ATOM   1295  C           0      16.892  32.144  27.817  3.95  1.00          C 0.00000
ATOM   1296  C           0      15.832  31.898  26.727  3.75  1.00          C 0.00000
ATOM   1297  O           0      24.580   2.313  29.582  3.05  1.00          O -.48200
ATOM   1298  C           0      23.542   2.131  30.189  3.52  1.00          C 0.52500
ATOM   1299  C           0      22.165   2.332  29.577  3.95  1.00          C -.04300
ATOM   1300  C           0      22.077   2.740  28.095  3.95  1.00          C 0.00000
ATOM   1301  C           0      20.650   2.728  27.517  3.95  1.00          C 0.00000
ATOM   1302  C           0      20.599   3.288  26.083  3.95  1.00          C 0.00000
ATOM   1303  C           0      19.147   3.344  25.573  3.95  1.00          C 0.00000
ATOM   1304  C           0      18.948   3.547  24.060  3.75  1.00          C 0.00000
ATOM   1305  O           0      14.928   1.656  31.875  3.05  1.00          O -.48200
ATOM   1306  C           0      14.969   2.672  32.545  3.52  1.00          C 0.52500
ATOM   1307  C           0      14.888   4.048  31.905  3.95  1.00          C -.04300
ATOM   1308  C           0      14.841   3.897  30.373  3.95  1.00          C 0.00000
ATOM   1309  C           0      14.881   5.197  29.549  3.95  1.00          C 0.00000
ATOM   1310  C           0      15.257   4.883  28.088  3.95  1.00          C 0.00000
ATOM   1311  C           0      15.038   6.170  27.272  3.95  1.00          C 0.00000
ATOM   1312  C           0      15.130   6.051  25.739  3.75  1.00          C 0.00000
ATOM   1313  O           0      28.119   7.150  28.836  3.05  1.00          O -.48200
ATOM   1314  C           0      27.621   8.179  28.420  3.52  1.00          C 0.52500
ATOM   1315  C           0      26.476   8.182  27.420  3.95  1.00          C -.04300
ATOM   1316  C           0      25.902   6.812  27.011  3.95  1.00          C 0.00000
ATOM   1317  C           0      24.854   7.056  25.909  3.95  1.00          C 0.00000
ATOM   1318  C           0      24.420   5.761  25.197  3.95  1.00          C 0.00000
ATOM   1319  C           0      23.699   6.038  23.865  3.95  1.00          C 0.00000
ATOM   1320  C           0      22.242   6.523  23.976  3.75  1.00          C 0.00000
ATOM   1321  O           0      16.441  22.972  28.916  3.05  1.00          O -.48200
ATOM   1322  C           0      15.539  22.189  28.684  3.52  1.00          C 0.52500
ATOM   1323  C           0      15.588  20.982  29.606  3.95  1.00          C -.04300
ATOM   1324  C           0      16.521  21.222  30.808  3.95  1.00          C 0.00000
ATOM   1325  C           0      16.652  20.152  31.907  3.95  1.00          C 0.00000
ATOM   1326  C           0      17.786  20.308  32.937  3.95  1.00          C 0.00000
ATOM   1327  C           0      17.527  21.521  33.849  3.95  1.00          C 0.00000
ATOM   1328  C           0      18.613  21.961  34.848  3.75  1.00          C 0.00000
ATOM   1329  O           0      20.240  24.015  31.863  3.05  1.00          O -.48200
ATOM   1330  C           0      19.965  23.510  30.790  3.52  1.00          C 0.52500
ATOM   1331  C           0      20.102  24.192  29.438  3.95  1.00          C -.04300
ATOM   1332  C           0      19.813  25.704  29.426  3.95  1.00          C 0.00000
ATOM   1333  C           0      19.658  26.313  28.020  3.95  1.00          C 0.00000
ATOM   1334  C           0      18.725  27.536  27.948  3.95  1.00          C 0.00000
ATOM   1335  C           0      18.725  28.215  26.566  3.95  1.00          C 0.00000
ATOM   1336  C           0      20.037  28.628  25.873  3.75  1.00          C 0.00000
ATOM   1337  O           0      21.479  35.370  30.688  3.05  1.00          O -.48200
ATOM   1338  C           0      20.795  34.403  30.411  3.52  1.00          C 0.52500
ATOM   1339  C           0      19.353  34.573  29.961  3.95  1.00          C -.04300
ATOM   1340  C           0      18.747  35.852  30.570  3.95  1.00          C 0.00000
ATOM   1341  C           0      17.343  36.280  30.106  3.95  1.00          C 0.00000
ATOM   1342  C           0      17.233  36.866  28.687  3.95  1.00          C 0.00000
ATOM   1343  C           0      15.772  37.004  28.220  3.95  1.00          C 0.00000
ATOM   1344  C           0      15.556  37.751  26.891  3.75  1.00          C 0.00000
ATOM   1345  O           0      19.415  35.099  25.553  3.05  1.00          O -.48200
ATOM   1346  C           0      19.947  34.029  25.782  3.52  1.00          C 0.52500
ATOM   1347  C           0      21.410  33.953  26.188  3.95  1.00          C -.04300
ATOM   1348  C           0      21.963  35.316  26.644  3.95  1.00          C 0.00000
ATOM   1349  C           0      23.460  35.193  26.982  3.95  1.00          C 0.00000
ATOM   1350  C           0      23.671  34.473  28.327  3.95  1.00          C 0.00000
ATOM   1351  C           0      25.081  34.605  28.933  3.95  1.00          C 0.00000
ATOM   1352  C           0      25.491  33.669  30.086  3.75  1.00          C 0.00000
ATOM   1353  O           0      30.826  10.734  31.808  3.05  1.00          O -.48200
ATOM   1354  C           0      30.121  11.390  32.552  3.52  1.00          C 0.52500
ATOM   1355  C           0      28.717  10.901  32.868  3.95  1.00          C -.04300
ATOM   1356  C           0      28.298   9.650  32.075  3.95  1.00          C 0.00000
ATOM   1357  C           0      27.008   9.064  32.677  3.95  1.00          C 0.00000
ATOM   1358  C           0      26.666   7.741  31.966  3.95  1.00          C 0.00000
ATOM   1359  C           0      25.265   7.151  32.213  3.95  1.00          C 0.00000
ATOM   1360  C           0      25.146   5.717  31.664  3.75  1.00          C 0.00000
ATOM   1361  O           0      22.585  16.227  28.731  3.05  1.00          O -.48200
ATOM   1362  C           0      23.016  15.534  27.829  3.52  1.00          C 0.52500
ATOM   1363  C           0      22.032  14.862  26.885  3.95  1.00          C -.04300
ATOM   1364  C           0      20.683  15.569  26.660  3.95  1.00          C 0.00000
ATOM   1365  C           0      19.716  14.699  25.834  3.95  1.00          C 0.00000
ATOM   1366  C           0      18.292  15.180  25.500  3.95  1.00          C 0.00000
ATOM   1367  C           0      17.332  14.297  24.680  3.95  1.00          C 0.00000
ATOM   1368  C           0      15.973  14.922  24.312  3.75  1.00          C 0.00000
ATOM   1369  O           0      25.922  11.777  31.080  3.05  1.00          O -.48200
ATOM   1370  C           0      25.593  12.852  30.614  3.52  1.00          C 0.52500
ATOM   1371  C           0      24.726  12.834  29.366  3.95  1.00          C -.04300
ATOM   1372  C           0      24.305  11.422  28.918  3.95  1.00          C 0.00000
ATOM   1373  C           0      23.467  11.399  27.626  3.95  1.00          C 0.00000
ATOM   1374  C           0      22.882  10.004  27.338  3.95  1.00          C 0.00000
ATOM   1375  C           0      22.367   9.928  25.888  3.95  1.00          C 0.00000
ATOM   1376  C           0      21.773  11.276  25.439  3.75  1.00          C 0.00000
ATOM   1377  O           0      24.498  28.518  31.674  3.05  1.00          O -.48200
ATOM   1378  C           0      24.500  27.874  32.707  3.52  1.00          C 0.52500
ATOM   1379  C           0      24.618  26.358  32.708  3.95  1.00          C -.04300
ATOM   1380  C           0      24.266  25.665  31.379  3.95  1.00          C 0.00000
ATOM   1381  C           0      24.593  24.171  31.200  3.95  1.00          C 0.00000
ATOM   1382  C           0      24.362  23.535  29.816  3.95  1.00          C 0.00000
ATOM   1383  C           0      24.987  24.303  28.637  3.95  1.00          C 0.00000
ATOM   1384  C           0      24.358  23.697  27.368  3.75  1.00          C 0.00000
ATOM   1385  O           0      22.959  27.554  27.312  3.05  1.00          O -.48200
ATOM   1386  C           0      23.692  28.294  27.941  3.52  1.00          C 0.52500
ATOM   1387  C           0      23.918  29.718  27.461  3.95  1.00          C -.04300
ATOM   1388  C           0      23.357  30.071  26.071  3.95  1.00          C 0.00000
ATOM   1389  C           0      24.203  29.438  24.950  3.95  1.00          C 0.00000
ATOM   1390  C           0      23.515  29.574  23.579  3.95  1.00          C 0.00000
ATOM   1391  C           0      24.440  29.385  22.362  3.95  1.00          C 0.00000
ATOM   1392  C           0      23.701  29.604  21.029  3.75  1.00          C 0.00000
ATOM   1393  O           0      30.626   2.758  26.426  3.05  1.00          O -.48200
ATOM   1394  C           0      29.884   3.578  26.934  3.52  1.00          C 0.52500
ATOM   1395  C           0      28.434   3.203  27.191  3.95  1.00          C -.04300
ATOM   1396  C           0      28.323   1.747  26.701  3.95  1.00          C 0.00000
ATOM   1397  C           0      26.916   1.178  26.438  3.95  1.00          C 0.00000
ATOM   1398  C           0      26.446   1.472  25.001  3.95  1.00          C 0.00000
ATOM   1399  C           0      25.111   0.822  24.595  3.95  1.00          C 0.00000
ATOM   1400  C           0      24.846   1.041  23.094  3.75  1.00          C 0.00000
ATOM   1401  O           0      27.690   3.775  32.166  3.05  1.00          O -.48200
ATOM   1402  C           0      28.362   4.598  31.573  3.52  1.00          C 0.52500
ATOM   1403  C           0      29.724   4.116  31.101  3.95  1.00          C -.04300
ATOM   1404  C           0      29.839   2.589  31.258  3.95  1.00          C 0.00000
ATOM   1405  C           0      31.097   1.857  30.755  3.95  1.00          C 0.00000
ATOM   1406  C           0      31.052   0.321  30.658  3.95  1.00          C 0.00000
ATOM   1407  C           0      30.639  -0.057  29.223  3.95  1.00          C 0.00000
ATOM   1408  C           0      31.909   0.044  28.358  3.75  1.00          C 0.00000
ATOM   1409  O           0      29.714  10.770  27.416  3.05  1.00          O -.48200
ATOM   1410  C           0      30.731  10.734  28.084  3.52  1.00          C 0.52500
ATOM   1411  C           0      31.575   9.512  28.411  3.95  1.00          C -.04300
ATOM   1412  C           0      31.172   8.236  27.649  3.95  1.00          C 0.00000
ATOM   1413  C           0      31.790   6.975  28.280  3.95  1.00          C 0.00000
ATOM   1414  C           0      33.327   6.958  28.377  3.95  1.00          C 0.00000
ATOM   1415  C           0      33.945   5.556  28.528  3.95  1.00          C 0.00000
ATOM   1416  C           0      35.474   5.658  28.680  3.75  1.00          C 0.00000
ATOM   1417  O           0      30.182  13.953  30.904  3.05  1.00          O -.48200
ATOM   1418  C           0      29.883  15.120  30.733  3.52  1.00          C 0.52500
ATOM   1419  C           0      29.984  16.105  31.886  3.95  1.00          C -.04300
ATOM   1420  C           0      30.411  15.522  33.246  3.95  1.00          C 0.00000
ATOM   1421  C           0      29.381  14.668  34.008  3.95  1.00          C 0.00000
ATOM   1422  C           0      29.913  14.041  35.310  3.95  1.00          C 0.00000
ATOM   1423  C           0      29.983  15.128  36.400  3.95  1.00          C 0.00000
ATOM   1424  C           0      30.350  14.574  37.789  3.75  1.00          C 0.00000
ATOM   1425  O           0      30.536  33.467  33.158  3.05  1.00          O -.48200
ATOM   1426  C           0      29.335  33.598  33.018  3.52  1.00          C 0.52500
ATOM   1427  C           0      28.467  32.737  32.115  3.95  1.00          C -.04300
ATOM   1428  C           0      28.967  31.314  31.804  3.95  1.00          C 0.00000
ATOM   1429  C           0      28.121  30.432  30.868  3.95  1.00          C 0.00000
ATOM   1430  C           0      28.462  28.953  31.128  3.95  1.00          C 0.00000
ATOM   1431  C           0      27.551  27.919  30.442  3.95  1.00          C 0.00000
ATOM   1432  C           0      28.243  26.561  30.219  3.75  1.00          C 0.00000
ATOM   1433  O           0      25.912  32.793  25.757  3.05  1.00          O -.48200
ATOM   1434  C           0      26.979  33.225  26.152  3.52  1.00          C 0.52500
ATOM   1435  C           0      27.949  32.182  26.685  3.95  1.00          C -.04300
ATOM   1436  C           0      27.585  30.736  26.299  3.95  1.00          C 0.00000
ATOM   1437  C           0      28.357  29.646  27.065  3.95  1.00          C 0.00000
ATOM   1438  C           0      28.418  28.218  26.490  3.95  1.00          C 0.00000
ATOM   1439  C           0      27.057  27.498  26.470  3.95  1.00          C 0.00000
ATOM   1440  C           0      27.096  26.165  25.699  3.75  1.00          C 0.00000
ATOM   1441  O           0       0.295  -2.267  26.259  3.05  1.00          O -.48200
ATOM   1442  C           0       0.959  -2.623  27.214  3.52  1.00          C 0.52500
ATOM   1443  C           0       1.104  -1.664  28.384  3.95  1.00          C -.04300
ATOM   1444  C           0       0.206  -0.413  28.397  3.95  1.00          C 0.00000
ATOM   1445  C           0       0.143   0.455  29.668  3.95  1.00          C 0.00000
ATOM   1446  C           0      -0.569   1.808  29.487  3.95  1.00          C 0.00000
ATOM   1447  C           0      -0.635   2.810  30.655  3.95  1.00          C 0.00000
ATOM   1448  C           0       0.830   3.144  30.993  3.75  1.00          C 0.00000
ATOM   1449  O           0       7.391   8.435  32.126  3.05  1.00          O -.48200
ATOM   1450  C           0       6.705   7.614  31.546  3.52  1.00          C 0.52500
ATOM   1451  C           0       5.192   7.587  31.405  3.95  1.00          C -.04300
ATOM   1452  C           0       4.468   8.338  32.538  3.95  1.00          C 0.00000
ATOM   1453  C           0       2.944   8.115  32.533  3.95  1.00          C 0.00000
ATOM   1454  C           0       2.215   8.928  33.618  3.95  1.00          C 0.00000
ATOM   1455  C           0       0.737   8.542  33.815  3.95  1.00          C 0.00000
ATOM   1456  C           0       0.066   9.045  35.106  3.75  1.00          C 0.00000
ATOM   1457  O           0      -2.662  12.916  34.632  3.05  1.00          O -.48200
ATOM   1458  C           0      -2.202  13.960  35.056  3.52  1.00          C 0.52500
ATOM   1459  C           0      -0.756  14.407  34.921  3.95  1.00          C -.04300
ATOM   1460  C           0       0.116  13.218  34.475  3.95  1.00          C 0.00000
ATOM   1461  C           0       1.607  13.588  34.579  3.95  1.00          C 0.00000
ATOM   1462  C           0       2.573  12.674  33.803  3.95  1.00          C 0.00000
ATOM   1463  C           0       4.070  12.952  34.038  3.95  1.00          C 0.00000
ATOM   1464  C           0       4.906  11.702  33.707  3.75  1.00          C 0.00000
ATOM   1465  O           0      36.329  14.769  29.756  3.05  1.00          O -.48200
ATOM   1466  C           0      36.110  15.747  29.064  3.52  1.00          C 0.52500
ATOM   1467  C           0      35.802  17.105  29.672  3.95  1.00          C -.04300
ATOM   1468  C           0      35.148  16.973  31.060  3.95  1.00          C 0.00000
ATOM   1469  C           0      34.779  18.312  31.726  3.95  1.00          C 0.00000
ATOM   1470  C           0      33.920  18.328  33.004  3.95  1.00          C 0.00000
ATOM   1471  C           0      33.624  19.777  33.433  3.95  1.00          C 0.00000
ATOM   1472  C           0      33.285  19.880  34.931  3.75  1.00          C 0.00000
ATOM   1473  O           0      28.904  23.687  36.826  3.05  1.00          O -.48200
ATOM   1474  C           0      27.828  23.945  36.321  3.52  1.00          C 0.52500
ATOM   1475  C           0      27.376  23.253  35.045  3.95  1.00          C -.04300
ATOM   1476  C           0      28.432  22.230  34.588  3.95  1.00          C 0.00000
ATOM   1477  C           0      27.780  21.329  33.522  3.95  1.00          C 0.00000
ATOM   1478  C           0      28.873  20.368  33.020  3.95  1.00          C 0.00000
ATOM   1479  C           0      28.233  19.278  32.140  3.95  1.00          C 0.00000
ATOM   1480  C           0      27.518  19.950  30.953  3.75  1.00          C 0.00000
ATOM   1481  O           0      37.516  33.891   1.800  3.05  1.00          O -.48200
ATOM   1482  C           0      36.489  34.461   1.484  3.52  1.00          C 0.52500
ATOM   1483  C           0      35.145  33.811   1.194  3.95  1.00          C -.04300
ATOM   1484  C           0      35.301  32.376   0.658  3.95  1.00          C 0.00000
ATOM   1485  C           0      33.971  31.600   0.622  3.95  1.00          C 0.00000
ATOM   1486  C           0      33.815  30.245  -0.094  3.95  1.00          C 0.00000
ATOM   1487  C           0      34.108  30.362  -1.601  3.95  1.00          C 0.00000
ATOM   1488  C           0      33.142  31.299  -2.350  3.75  1.00          C 0.00000
ATOM   1489  O           0      12.701  32.702  27.160  3.05  1.00          O -.48200
ATOM   1490  C           0      12.038  31.692  27.310  3.52  1.00          C 0.52500
ATOM   1491  C           0      11.323  31.499  28.638  3.95  1.00          C -.04300
ATOM   1492  C           0      10.587  32.832  28.865  3.95  1.00          C 0.00000
ATOM   1493  C           0       9.841  32.733  30.209  3.95  1.00          C 0.00000
ATOM   1494  C           0       9.347  34.041  30.855  3.95  1.00          C 0.00000
ATOM   1495  C           0       8.831  33.914  32.301  3.95  1.00          C 0.00000
ATOM   1496  C           0       7.792  34.983  32.690  3.75  1.00          C 0.00000
ATOM   1497  O           0       7.086  37.571  26.553  3.05  1.00          O -.48200
ATOM   1498  C           0       6.626  37.311  27.649  3.52  1.00          C 0.52500
ATOM   1499  C           0       6.964  35.992  28.325  3.95  1.00          C -.04300
ATOM   1500  C           0       5.712  35.185  28.717  3.95  1.00          C 0.00000
ATOM   1501  C           0       5.988  33.892  29.506  3.95  1.00          C 0.00000
ATOM   1502  C           0       4.742  33.125  29.986  3.95  1.00          C 0.00000
ATOM   1503  C           0       4.951  32.208  31.206  3.95  1.00          C 0.00000
ATOM   1504  C           0       3.588  31.640  31.645  3.75  1.00          C 0.00000
ATOM   1505  O           0      12.037  10.806  37.692  3.05  1.00          O -.48200
ATOM   1506  C           0      11.343  11.710  38.120  3.52  1.00          C 0.52500
ATOM   1507  C           0      10.458  12.660  37.331  3.95  1.00          C -.04300
ATOM   1508  C           0      10.284  12.032  35.935  3.95  1.00          C 0.00000
ATOM   1509  C           0       9.230  12.617  34.977  3.95  1.00          C 0.00000
ATOM   1510  C           0       9.759  12.644  33.531  3.95  1.00          C 0.00000
ATOM   1511  C           0       8.850  13.384  32.532  3.95  1.00          C 0.00000
ATOM   1512  C           0       9.616  13.691  31.232  3.75  1.00          C 0.00000
ATOM   1513  O           0       5.424  21.701  34.436  3.05  1.00          O -.48200
ATOM   1514  C           0       6.170  20.811  34.801  3.52  1.00          C 0.52500
ATOM   1515  C           0       6.033  19.415  34.215  3.95  1.00          C -.04300
ATOM   1516  C           0       4.825  19.470  33.260  3.95  1.00          C 0.00000
ATOM   1517  C           0       4.403  18.038  32.882  3.95  1.00          C 0.00000
ATOM   1518  C           0       3.252  17.805  31.886  3.95  1.00          C 0.00000
ATOM   1519  C           0       3.022  16.318  31.558  3.95  1.00          C 0.00000
ATOM   1520  C           0       4.134  15.658  30.721  3.75  1.00          C 0.00000
ATOM   1521  O           0       3.028  24.124   2.382  3.05  1.00          O -.48200
ATOM   1522  C           0       4.152  24.014   1.930  3.52  1.00          C 0.52500
ATOM   1523  C           0       4.471  24.312   0.474  3.95  1.00          C -.04300
ATOM   1524  C           0       3.343  25.062  -0.260  3.95  1.00          C 0.00000
ATOM   1525  C           0       3.161  26.554   0.073  3.95  1.00          C 0.00000
ATOM   1526  C           0       1.932  27.145  -0.642  3.95  1.00          C 0.00000
ATOM   1527  C           0       1.262  28.345   0.052  3.95  1.00          C 0.00000
ATOM   1528  C           0       1.815  29.698  -0.432  3.75  1.00          C 0.00000
ATOM   1529  O           0       5.458  35.058  35.456  3.05  1.00          O -.48200
ATOM   1530  C           0       4.873  34.154  36.024  3.52  1.00          C 0.52500
ATOM   1531  C           0       5.505  32.774  35.936  3.95  1.00          C -.04300
ATOM   1532  C           0       6.990  32.976  35.581  3.95  1.00          C 0.00000
ATOM   1533  C           0       7.612  31.669  35.056  3.95  1.00          C 0.00000
ATOM   1534  C           0       6.860  31.005  33.887  3.95  1.00          C 0.00000
ATOM   1535  C           0       7.536  29.716  33.386  3.95  1.00          C 0.00000
ATOM   1536  C           0       6.895  28.995  32.185  3.75  1.00          C 0.00000
ATOM   1537  O           0      13.516   0.344   0.225  3.05  1.00          O -.48200
ATOM   1538  C           0      12.750  -0.581   0.030  3.52  1.00          C 0.52500
ATOM   1539  C           0      11.559  -0.807   0.947  3.95  1.00          C -.04300
ATOM   1540  C           0      11.462   0.148   2.151  3.95  1.00          C 0.00000
ATOM   1541  C           0      10.154   0.152   2.964  3.95  1.00          C 0.00000
ATOM   1542  C           0       9.994   1.320   3.955  3.95  1.00          C 0.00000
ATOM   1543  C           0      11.256   1.672   4.763  3.95  1.00          C 0.00000
ATOM   1544  C           0      11.049   2.864   5.716  3.75  1.00          C 0.00000
ATOM   1545  O           0      17.236  11.104  26.819  3.05  1.00          O -.48200
ATOM   1546  C           0      17.819  10.544  25.908  3.52  1.00          C 0.52500
ATOM   1547  C           0      18.381   9.138  26.037  3.95  1.00          C -.04300
ATOM   1548  C           0      18.436   8.499  27.437  3.95  1.00          C 0.00000
ATOM   1549  C           0      19.421   7.315  27.442  3.95  1.00          C 0.00000
ATOM   1550  C           0      19.771   6.876  28.876  3.95  1.00          C 0.00000
ATOM   1551  C           0      20.980   7.609  29.486  3.95  1.00          C 0.00000
ATOM   1552  C           0      21.517   6.924  30.756  3.75  1.00          C 0.00000
ATOM   1553  O           0      13.559  16.426  32.218  3.05  1.00          O -.48200
ATOM   1554  C           0      14.480  16.577  32.998  3.52  1.00          C 0.52500
ATOM   1555  C           0      14.454  16.063  34.429  3.95  1.00          C -.04300
ATOM   1556  C           0      13.450  14.969  34.837  3.95  1.00          C 0.00000
ATOM   1557  C           0      13.637  13.622  34.113  3.95  1.00          C 0.00000
ATOM   1558  C           0      14.850  12.805  34.597  3.95  1.00          C 0.00000
ATOM   1559  C           0      14.758  12.630  36.124  3.95  1.00          C 0.00000
ATOM   1560  C           0      15.927  11.750  36.601  3.75  1.00          C 0.00000
ATOM   1561  O           0      13.874  20.846   0.168  3.05  1.00          O -.48200
ATOM   1562  C           0      14.789  20.131  -0.195  3.52  1.00          C 0.52500
ATOM   1563  C           0      15.639  19.364   0.805  3.95  1.00          C -.04300
ATOM   1564  C           0      15.109  19.392   2.250  3.95  1.00          C 0.00000
ATOM   1565  C           0      16.087  18.896   3.331  3.95  1.00          C 0.00000
ATOM   1566  C           0      15.579  19.044   4.777  3.95  1.00          C 0.00000
ATOM   1567  C           0      16.765  18.785   5.726  3.95  1.00          C 0.00000
ATOM   1568  C           0      16.284  19.041   7.166  3.75  1.00          C 0.00000
ATOM   1569  O           0      12.087  23.316  34.767  3.05  1.00          O -.48200
ATOM   1570  C           0      12.840  22.712  34.026  3.52  1.00          C 0.52500
ATOM   1571  C           0      13.257  23.248  32.666  3.95  1.00          C -.04300
ATOM   1572  C           0      12.670  24.653  32.437  3.95  1.00          C 0.00000
ATOM   1573  C           0      13.104  25.366  31.143  3.95  1.00          C 0.00000
ATOM   1574  C           0      12.121  26.505  30.812  3.95  1.00          C 0.00000
ATOM   1575  C           0      11.981  27.585  31.900  3.95  1.00          C 0.00000
ATOM   1576  C           0      10.745  28.489  31.734  3.75  1.00          C 0.00000
ATOM   1577  O           0      22.104  31.392  30.177  3.05  1.00          O -.48200
ATOM   1578  C           0      22.537  30.863  31.183  3.52  1.00          C 0.52500
ATOM   1579  C           0      21.631  29.882  31.910  3.95  1.00          C -.04300
ATOM   1580  C           0      20.182  29.703  31.420  3.95  1.00          C 0.00000
ATOM   1581  C           0      19.469  28.703  32.349  3.95  1.00          C 0.00000
ATOM   1582  C           0      18.009  28.533  31.888  3.95  1.00          C 0.00000
ATOM   1583  C           0      17.182  27.893  33.019  3.95  1.00          C 0.00000
ATOM   1584  C           0      17.249  28.614  34.378  3.75  1.00          C 0.00000
ATOM   1585  O           0      17.970  37.425  35.292  3.05  1.00          O -.48200
ATOM   1586  C           0      16.915  37.014  35.737  3.52  1.00          C 0.52500
ATOM   1587  C           0      16.385  35.623  35.430  3.95  1.00          C -.04300
ATOM   1588  C           0      17.430  34.723  34.744  3.95  1.00          C 0.00000
ATOM   1589  C           0      16.974  33.289  34.416  3.95  1.00          C 0.00000
ATOM   1590  C           0      18.053  32.416  33.748  3.95  1.00          C 0.00000
ATOM   1591  C           0      19.379  32.250  34.512  3.95  1.00          C 0.00000
ATOM   1592  C           0      19.064  31.665  35.901  3.75  1.00          C 0.00000
ATOM   1593  O           0      24.706  10.807  35.315  3.05  1.00          O -.48200
ATOM   1594  C           0      23.510  10.668  35.492  3.52  1.00          C 0.52500
ATOM   1595  C           0      22.555  10.207  34.403  3.95  1.00          C -.04300
ATOM   1596  C           0      21.620  11.272  33.800  3.95  1.00          C 0.00000
ATOM   1597  C           0      21.681  11.173  32.264  3.95  1.00          C 0.00000
ATOM   1598  C           0      20.612  12.131  31.704  3.95  1.00          C 0.00000
ATOM   1599  C           0      20.326  12.213  30.193  3.95  1.00          C 0.00000
ATOM   1600  C           0      19.744  13.617  29.950  3.75  1.00          C 0.00000
 TER
 END
